# Supplementary material for: Temperature Dependence of the Polar and Lewis Acid–Base Properties of Poly Methyl Methacrylate Adsorbed on Silica via Inverse Gas Chromatography
Source: MDPI journal article supplement (doi:10.3390/molecules29081688), 2024-04-09
Supplement: s1 [file s1]

## Supplementary Materials

# Temperature Dependence of the Polar and Lewis Acid–Base Properties of Poly Methyl Methacrylate Adsorbed on Silica via Inverse Gas Chromatography

Tayssir Hamieh<sup>1,2</sup>

<sup>1</sup>Faculty of Science and Engineering, Maastricht University, P.O. Box 616, 6200 MD Maastricht, Netherlands

<sup>2</sup>Laboratory of Materials, Catalysis, Environment and Analytical Methods (MCEMA), Faculty of Sciences, Lebanese University, Hadath, Lebanon

Correspondence: Faculty of Science and Engineering, Maastricht University, P.O. Box 616, 6200 MD Maastricht, The Netherlands, E-mail: [t.hamieh@maastrichtuniversity.nl](mailto:t.hamieh@maastrichtuniversity.nl)

**Table S1.** Values of deformation polarizability and ionization energy of n-alkanes and polar molecules.

| Molecule                        | $\epsilon_X$<br>(eV) | $\alpha_0$<br>( $10^{-30} \text{ m}^3$ ) | $\alpha_0$<br>( $10^{-40} \text{ C m}^2/\text{V}$ ) |
|---------------------------------|----------------------|------------------------------------------|-----------------------------------------------------|
| n-pentane                       | 10.28                | 9.99                                     | 11.12                                               |
| n-hexane                        | 10.13                | 11.90                                    | 13.24                                               |
| n-heptane                       | 9.93                 | 13.61                                    | 15.14                                               |
| n-octane                        | 9.80                 | 15.90                                    | 17.69                                               |
| n-octane                        | 9.71                 | 17.36                                    | 19.32                                               |
| CCl <sub>4</sub>                | 11.47                | 10.85                                    | 12.07                                               |
| CHCl <sub>3</sub>               | 11.32                | 7.21                                     | 8.02                                                |
| CH <sub>2</sub> Cl <sub>2</sub> | 11.37                | 8.87                                     | 9.86                                                |
| Diethyl ether                   | 9.51                 | 9.47                                     | 10.54                                               |
| Tetrahydrofuran                 | 9.38                 | 8.22                                     | 9.15                                                |
| Ethyl acetate                   | 10.01                | 9.16                                     | 10.19                                               |
| Toluene                         | 8.83                 | 11.80                                    | 13.13                                               |

**Table S2.** Values of the harmonic mean of the ionization energies  $\frac{\epsilon_S \epsilon_X}{(\epsilon_S + \epsilon_X)}$  of silica and organic solvents and the parameter  $\frac{3\mathcal{N}}{2(4\pi\epsilon_0)^2} \mathcal{P}_{S-X}$  for the various organic molecules.

| Molecule | $\frac{\epsilon_S \epsilon_X}{(\epsilon_S + \epsilon_X)}$ | $\frac{3\mathcal{N}}{2(4\pi\epsilon_0)^2} \mathcal{P}_{S-X}$ |
|----------|-----------------------------------------------------------|--------------------------------------------------------------|
|----------|-----------------------------------------------------------|--------------------------------------------------------------|

|                                 | (10 <sup>-19</sup> J) | (10 <sup>-15</sup> SI) |
|---------------------------------|-----------------------|------------------------|
| n-pentane                       | 7.274                 | 58.992                 |
| n-hexane                        | 7.226                 | 69.814                 |
| n-heptane                       | 7.162                 | 79.135                 |
| n-octane                        | 7.119                 | 91.901                 |
| n-octane                        | 7.089                 | 99.919                 |
| CCl <sub>4</sub>                | 7.623                 | 67.151                 |
| CHCl <sub>3</sub>               | 7.582                 | 44.379                 |
| CH <sub>2</sub> Cl <sub>2</sub> | 7.596                 | 54.666                 |
| Diethyl ether                   | 7.022                 | 53.988                 |
| Tetrahydrofuran                 | 6.977                 | 46.564                 |
| Ethyl acetate                   | 7.188                 | 53.453                 |

**Table S3.** Values of the harmonic mean of the ionization energies  $\frac{\epsilon_S \epsilon_X}{(\epsilon_S + \epsilon_X)}$  of PMMA and organic solvents and the parameter  $\frac{3\mathcal{N}}{2(4\pi\epsilon_0)^2} \mathcal{P}_{S-X}$  for the various organic molecules.

| Molecule                        | $\frac{\epsilon_S \epsilon_X}{(\epsilon_S + \epsilon_X)}$<br>(10 <sup>-19</sup> J) | $\frac{3\mathcal{N}}{2(4\pi\epsilon_0)^2} \mathcal{P}_{S-X}$<br>(10 <sup>-15</sup> SI) |
|---------------------------------|------------------------------------------------------------------------------------|----------------------------------------------------------------------------------------|
| n-pentane                       | 6.947                                                                              | 56.348                                                                                 |
| n-hexane                        | 6.904                                                                              | 66.704                                                                                 |
| n-heptane                       | 6.846                                                                              | 75.640                                                                                 |
| n-octane                        | 6.807                                                                              | 87.865                                                                                 |
| n-octane                        | 6.779                                                                              | 95.548                                                                                 |
| CCl <sub>4</sub>                | 7.266                                                                              | 64.003                                                                                 |
| CHCl <sub>3</sub>               | 7.228                                                                              | 42.309                                                                                 |
| CH <sub>2</sub> Cl <sub>2</sub> | 7.241                                                                              | 52.112                                                                                 |
| Diethyl ether                   | 6.718                                                                              | 51.648                                                                                 |
| Tetrahydrofuran                 | 6.677                                                                              | 44.558                                                                                 |
| Ethyl acetate                   | 6.869                                                                              | 51.084                                                                                 |

**Table S4.** Values of  $(-\Delta G_a^p(T))$  kJ/mol of polar molecules adsorbed on silica particles as a function of the temperature.

| Polar free energy of solvents adsorbed on silica ( $\theta = 0$ ) |                  |                                 |                   |               |        |               |         |
|-------------------------------------------------------------------|------------------|---------------------------------|-------------------|---------------|--------|---------------|---------|
| Temperature T(K)                                                  | CCl <sub>4</sub> | CH <sub>2</sub> Cl <sub>2</sub> | CHCl <sub>3</sub> | Diethyl ether | THF    | Ethyl acetate | Toluene |
| 303.15                                                            | 6.674            | 25.241                          | 20.030            | 28.337        | 37.697 | 17.422        | 17.701  |
| 313.15                                                            | 6.715            | 24.896                          | 19.854            | 27.581        | 36.486 | 17.089        | 17.452  |
| 323.15                                                            | 6.752            | 24.807                          | 19.752            | 26.838        | 35.506 | 16.852        | 17.328  |
| 328.15                                                            | 6.777            | 24.379                          | 19.590            | 26.447        | 34.669 | 16.590        | 17.078  |
| 333.15                                                            | 6.797            | 24.206                          | 19.502            | 26.069        | 34.064 | 16.423        | 16.954  |
| 338.15                                                            | 6.818            | 24.034                          | 19.414            | 25.691        | 33.458 | 16.257        | 16.829  |
| 343.15                                                            | 6.809            | 23.876                          | 19.303            | 25.462        | 32.786 | 16.149        | 16.722  |
| 348.15                                                            | 6.859            | 23.689                          | 19.238            | 24.935        | 32.247 | 15.924        | 16.580  |

|        |       |        |        |        |        |        |        |
|--------|-------|--------|--------|--------|--------|--------|--------|
| 353.15 | 6.879 | 23.516 | 19.150 | 24.557 | 31.642 | 15.757 | 16.456 |
| 363.15 | 6.884 | 23.102 | 18.927 | 23.805 | 30.437 | 15.394 | 16.170 |
| 373.15 | 6.961 | 22.826 | 18.798 | 23.045 | 29.220 | 15.091 | 15.958 |
| 378.15 | 6.982 | 22.654 | 18.710 | 22.667 | 28.614 | 14.925 | 15.833 |
| 383.15 | 6.969 | 22.285 | 18.547 | 22.315 | 27.908 | 14.704 | 15.598 |
| 388.15 | 7.023 | 22.309 | 18.534 | 21.911 | 27.403 | 14.592 | 15.584 |
| 393.15 | 7.043 | 22.136 | 18.446 | 21.533 | 26.798 | 14.425 | 15.460 |
| 398.15 | 7.064 | 21.964 | 18.358 | 21.155 | 26.192 | 14.259 | 15.335 |
| 403.15 | 7.127 | 21.689 | 18.248 | 20.674 | 25.592 | 14.080 | 15.184 |
| 408.15 | 7.105 | 21.619 | 18.182 | 20.399 | 24.981 | 13.926 | 15.086 |
| 413.15 | 7.125 | 21.446 | 18.094 | 20.021 | 24.376 | 13.759 | 14.962 |
| 423.15 | 7.205 | 21.206 | 18.006 | 19.185 | 23.401 | 13.498 | 14.834 |
| 433.15 | 7.207 | 20.756 | 17.742 | 18.509 | 21.954 | 13.093 | 14.464 |
| 443.15 | 7.248 | 20.411 | 17.566 | 17.753 | 20.743 | 12.760 | 14.215 |
| 453.15 | 7.289 | 20.066 | 17.390 | 16.997 | 19.532 | 12.427 | 13.966 |
| 463.15 | 7.348 | 20.070 | 17.346 | 16.496 | 18.659 | 12.350 | 13.973 |
| 473.15 | 7.371 | 19.376 | 17.038 | 15.485 | 17.110 | 11.761 | 13.468 |

**Table S5.** Values of  $(-\Delta G_a^p(T))$  kJ/mol) of polar molecules adsorbed on PMMA particles as a function of the temperature.

| Polar free energy of solvents adsorbed on PMMA |                  |                                 |                   |               |        |               |         |
|------------------------------------------------|------------------|---------------------------------|-------------------|---------------|--------|---------------|---------|
| Temperature T(K)                               | CCl <sub>4</sub> | CH <sub>2</sub> Cl <sub>2</sub> | CHCl <sub>3</sub> | Diethyl ether | THF    | Ethyl acetate | Toluene |
| 303.15                                         | 10.765           | 18.520                          | 16.079            | 15.039        | 19.851 | 16.029        | 13.204  |
| 313.15                                         | 10.254           | 16.940                          | 14.930            | 13.956        | 18.940 | 14.694        | 12.212  |
| 323.15                                         | 10.294           | 16.034                          | 15.101            | 14.437        | 18.822 | 14.037        | 11.443  |
| 328.15                                         | 10.808           | 15.902                          | 15.552            | 15.362        | 19.155 | 14.498        | 11.677  |
| 333.15                                         | 11.434           | 17.105                          | 16.068            | 16.544        | 19.846 | 15.192        | 12.190  |
| 338.15                                         | 9.631            | 14.792                          | 13.161            | 13.037        | 17.712 | 13.243        | 10.501  |
| 343.15                                         | 10.629           | 15.055                          | 14.098            | 13.685        | 18.247 | 13.912        | 11.245  |
| 348.15                                         | 11.414           | 15.178                          | 15.013            | 14.115        | 18.667 | 14.430        | 11.989  |
| 353.15                                         | 11.721           | 14.911                          | 14.782            | 13.980        | 18.464 | 14.285        | 11.936  |
| 363.15                                         | 10.816           | 13.717                          | 12.961            | 12.873        | 17.352 | 13.499        | 10.680  |
| 373.15                                         | 10.821           | 12.279                          | 9.454             | 11.020        | 16.585 | 12.891        | 10.111  |
| 378.15                                         | 11.206           | 13.019                          | 10.825            | 10.962        | 17.252 | 13.325        | 10.604  |
| 383.15                                         | 11.772           | 14.521                          | 12.968            | 12.321        | 18.652 | 14.659        | 12.181  |
| 388.15                                         | 12.487           | 10.832                          | 12.193            | 10.936        | 16.403 | 11.700        | 9.624   |
| 393.15                                         | 10.950           | 12.707                          | 11.533            | 11.870        | 15.718 | 10.781        | 8.900   |
| 398.15                                         | 11.029           | 12.170                          | 10.930            | 11.397        | 15.638 | 12.783        | 10.237  |
| 403.15                                         | 11.465           | 11.776                          | 10.791            | 11.399        | 15.942 | 13.202        | 10.136  |
| 408.15                                         | 11.830           | 11.631                          | 10.794            | 11.360        | 16.258 | 13.460        | 10.355  |
| 413.15                                         | 11.758           | 11.135                          | 10.040            | 10.942        | 16.106 | 13.146        | 10.197  |
| 423.15                                         | 11.929           | 11.458                          | 10.113            | 11.090        | 17.047 | 13.434        | 10.433  |
| 433.15                                         | 13.579           | 13.574                          | 11.582            | 12.569        | 19.030 | 15.576        | 12.048  |
| 443.15                                         | 12.136           | 10.220                          | 8.929             | 9.901         | 15.065 | 13.114        | 10.016  |
| 453.15                                         | 12.047           | 9.388                           | 7.939             | 9.244         | 14.165 | 12.620        | 9.682   |

|        |        |       |       |       |        |        |       |
|--------|--------|-------|-------|-------|--------|--------|-------|
| 463.15 | 12.299 | 8.917 | 7.617 | 9.151 | 13.848 | 12.645 | 9.287 |
| 473.15 | 11.924 | 7.776 | 6.642 | 8.470 | 12.938 | 11.811 | 8.280 |

**Table S6.** Values of  $(-\Delta G_a^p(T))$  kJ/mol) of polar molecules adsorbed on the system PMMA/silica as a function of the temperature for a recovery fraction  $\theta = 0.31$ .

| Polar free energy of solvents adsorbed on PMMA/silica for $\theta = 0.31$ |                  |                                 |                   |               |        |               |         |
|---------------------------------------------------------------------------|------------------|---------------------------------|-------------------|---------------|--------|---------------|---------|
| Temperature T(K)                                                          | CCl <sub>4</sub> | CH <sub>2</sub> Cl <sub>2</sub> | CHCl <sub>3</sub> | Diethyl ether | THF    | Ethyl acetate | Toluene |
| 303.15                                                                    | 6.698            | 20.777                          | 15.865            | 16.603        | 20.647 | 14.300        | 14.620  |
| 313.15                                                                    | 6.055            | 19.604                          | 14.885            | 15.493        | 18.449 | 12.803        | 13.694  |
| 323.15                                                                    | 5.932            | 18.973                          | 14.390            | 14.799        | 17.228 | 12.216        | 13.726  |
| 328.15                                                                    | 5.704            | 18.169                          | 13.853            | 14.282        | 16.141 | 11.486        | 13.530  |
| 333.15                                                                    | 6.253            | 18.442                          | 14.047            | 14.603        | 16.362 | 11.672        | 14.064  |
| 338.15                                                                    | 6.519            | 18.608                          | 14.218            | 13.973        | 16.216 | 11.637        | 14.235  |
| 343.15                                                                    | 6.605            | 19.382                          | 14.562            | 13.340        | 15.835 | 11.926        | 14.005  |
| 348.15                                                                    | 6.730            | 18.336                          | 12.890            | 12.001        | 14.743 | 10.618        | 13.470  |
| 353.15                                                                    | 7.264            | 18.364                          | 13.507            | 12.453        | 14.008 | 10.503        | 13.290  |
| 363.15                                                                    | 6.952            | 18.115                          | 13.879            | 11.315        | 12.626 | 9.424         | 13.254  |
| 373.15                                                                    | 6.584            | 17.019                          | 12.869            | 9.437         | 10.630 | 7.416         | 12.282  |
| 378.15                                                                    | 6.844            | 17.200                          | 13.082            | 8.936         | 10.315 | 7.107         | 12.492  |
| 383.15                                                                    | 6.714            | 16.865                          | 12.933            | 8.706         | 9.823  | 6.584         | 12.327  |
| 388.15                                                                    | 7.111            | 17.412                          | 13.320            | 9.047         | 10.139 | 6.829         | 12.940  |
| 393.15                                                                    | 7.605            | 18.243                          | 13.964            | 9.984         | 10.797 | 7.413         | 13.547  |
| 398.15                                                                    | 8.913            | 19.648                          | 15.146            | 11.268        | 12.232 | 8.909         | 14.775  |
| 403.15                                                                    | 11.229           | 21.423                          | 17.010            | 11.072        | 12.576 | 8.802         | 16.772  |
| 408.15                                                                    | 10.654           | 19.980                          | 15.734            | 11.281        | 11.759 | 7.117         | 15.461  |
| 413.15                                                                    | 9.879            | 18.756                          | 14.746            | 8.496         | 9.743  | 7.482         | 12.252  |
| 423.15                                                                    | 8.281            | 17.133                          | 13.433            | 6.152         | 6.444  | 7.003         | 12.634  |
| 433.15                                                                    | 8.092            | 16.598                          | 13.170            | 6.621         | 7.368  | 7.619         | 13.247  |
| 443.15                                                                    | 12.550           | 21.255                          | 17.518            | 8.654         | 8.665  | 11.397        | 16.279  |
| 453.15                                                                    | 10.367           | 18.117                          | 14.996            | 10.447        | 8.862  | 11.040        | 14.673  |
| 463.15                                                                    | 8.354            | 15.912                          | 12.490            | 10.442        | 1.559  | 9.852         | 11.573  |
| 473.15                                                                    | 7.697            | 12.895                          | 10.572            | 9.325         | 0.595  | 8.197         | 8.969   |

**Table S7.** Values of  $(-\Delta G_a^p(T))$  kJ/mol) of polar molecules adsorbed on the system PMMA/silica as a function of the temperature for a recovery fraction  $\theta = 0.83$ .

| Polar free energy of solvents adsorbed on PMMA/silica for $\theta = 0.83$ |                  |                                 |                   |               |        |               |         |
|---------------------------------------------------------------------------|------------------|---------------------------------|-------------------|---------------|--------|---------------|---------|
| Temperature T(K)                                                          | CCl <sub>4</sub> | CH <sub>2</sub> Cl <sub>2</sub> | CHCl <sub>3</sub> | Diethyl ether | THF    | Ethyl acetate | Toluene |
| 303.15                                                                    | 7.773            | 27.605                          | 23.019            | 21.816        | 25.479 | 20.114        | 17.258  |
| 313.15                                                                    | 7.219            | 25.780                          | 21.588            | 20.382        | 24.106 | 18.354        | 15.812  |
| 323.15                                                                    | 7.726            | 24.330                          | 20.823            | 19.402        | 23.091 | 16.800        | 15.052  |
| 328.15                                                                    | 7.983            | 24.125                          | 20.151            | 19.158        | 22.906 | 16.021        | 14.985  |
| 333.15                                                                    | 8.322            | 24.143                          | 20.132            | 18.742        | 22.962 | 15.604        | 15.539  |
| 338.15                                                                    | 8.421            | 24.970                          | 20.394            | 18.368        | 23.217 | 16.923        | 15.672  |

|        |        |        |        |        |        |        |        |
|--------|--------|--------|--------|--------|--------|--------|--------|
| 343.15 | 7.970  | 23.919 | 20.547 | 18.073 | 21.957 | 16.634 | 14.982 |
| 348.15 | 8.213  | 23.804 | 20.465 | 17.719 | 21.787 | 16.379 | 15.316 |
| 353.15 | 8.480  | 23.752 | 20.339 | 17.763 | 21.690 | 16.315 | 15.442 |
| 363.15 | 7.946  | 22.566 | 19.802 | 16.558 | 19.764 | 14.651 | 13.973 |
| 373.15 | 7.400  | 21.338 | 18.643 | 15.259 | 18.336 | 12.867 | 13.259 |
| 378.15 | 7.177  | 21.114 | 18.505 | 14.790 | 17.504 | 12.511 | 12.966 |
| 383.15 | 8.088  | 21.872 | 19.412 | 15.216 | 18.162 | 13.086 | 13.592 |
| 388.15 | 9.738  | 23.872 | 20.633 | 17.249 | 20.357 | 14.790 | 15.021 |
| 393.15 | 7.975  | 22.237 | 18.677 | 16.071 | 19.312 | 12.425 | 13.092 |
| 398.15 | 7.579  | 21.453 | 18.849 | 14.284 | 17.365 | 9.449  | 10.478 |
| 403.15 | 8.266  | 21.428 | 19.153 | 13.895 | 17.001 | 11.597 | 13.409 |
| 408.15 | 8.378  | 20.973 | 18.729 | 13.601 | 16.463 | 11.654 | 13.423 |
| 413.15 | 8.176  | 20.481 | 18.274 | 13.057 | 15.661 | 11.281 | 13.111 |
| 423.15 | 8.263  | 20.132 | 18.597 | 12.392 | 14.863 | 11.137 | 12.497 |
| 433.15 | 9.011  | 21.753 | 19.964 | 13.615 | 16.245 | 12.413 | 13.101 |
| 443.15 | 8.413  | 19.670 | 18.315 | 11.083 | 13.556 | 10.859 | 12.321 |
| 453.15 | 8.373  | 19.017 | 17.896 | 10.411 | 12.693 | 10.113 | 12.024 |
| 463.15 | 11.973 | 22.320 | 21.465 | 13.227 | 15.364 | 12.954 | 15.267 |
| 473.15 | 8.067  | 17.745 | 16.842 | 8.413  | 10.414 | 7.945  | 10.717 |

**Table S8.** Values of  $(-\Delta G_a^p(T))$  kJ/mol of polar molecules adsorbed on the system PMMA/silica as a function of the temperature for a recovery fraction  $\theta = 1$ .

| Polar free energy of solvents adsorbed on PMMA/silica for $\theta = 1$ |                  |                                 |                   |               |        |               |         |
|------------------------------------------------------------------------|------------------|---------------------------------|-------------------|---------------|--------|---------------|---------|
| Temperature T(K)                                                       | CCl <sub>4</sub> | CH <sub>2</sub> Cl <sub>2</sub> | CHCl <sub>3</sub> | Diethyl ether | THF    | Ethyl acetate | Toluene |
| 303.15                                                                 | 13.797           | 36.031                          | 32.260            | 30.623        | 38.590 | 21.479        | 26.098  |
| 313.15                                                                 | 13.567           | 31.827                          | 28.141            | 27.132        | 33.996 | 20.360        | 23.011  |
| 323.15                                                                 | 12.594           | 27.832                          | 24.874            | 23.581        | 28.575 | 18.376        | 20.293  |
| 328.15                                                                 | 12.366           | 26.052                          | 22.043            | 21.509        | 26.236 | 17.682        | 17.852  |
| 333.15                                                                 | 12.572           | 25.107                          | 21.512            | 20.173        | 24.834 | 17.746        | 17.145  |
| 338.15                                                                 | 11.175           | 23.004                          | 19.957            | 18.075        | 22.883 | 17.019        | 15.721  |
| 343.15                                                                 | 7.827            | 22.303                          | 19.418            | 17.043        | 22.426 | 16.908        | 15.316  |
| 348.15                                                                 | 8.731            | 23.918                          | 21.243            | 17.929        | 23.166 | 17.644        | 16.472  |
| 353.15                                                                 | 9.682            | 24.387                          | 21.614            | 18.557        | 23.527 | 17.500        | 17.214  |
| 363.15                                                                 | 11.294           | 24.438                          | 22.228            | 19.161        | 23.921 | 16.971        | 17.656  |
| 373.15                                                                 | 11.607           | 23.218                          | 21.724            | 18.422        | 22.395 | 15.990        | 16.949  |
| 378.15                                                                 | 11.599           | 23.350                          | 21.692            | 18.202        | 22.230 | 16.213        | 17.043  |
| 383.15                                                                 | 12.922           | 25.912                          | 23.757            | 19.957        | 24.657 | 18.321        | 18.608  |
| 388.15                                                                 | 14.514           | 28.129                          | 25.061            | 21.098        | 23.208 | 20.016        | 17.299  |
| 393.15                                                                 | 11.630           | 25.838                          | 23.488            | 18.299        | 21.089 | 17.162        | 14.154  |
| 398.15                                                                 | 9.405            | 22.887                          | 20.451            | 15.594        | 19.094 | 15.325        | 12.647  |
| 403.15                                                                 | 7.366            | 18.964                          | 17.081            | 12.048        | 17.162 | 14.041        | 13.030  |
| 408.15                                                                 | 7.781            | 18.878                          | 17.221            | 12.010        | 16.629 | 13.365        | 13.403  |
| 413.15                                                                 | 8.249            | 19.192                          | 17.691            | 12.004        | 16.478 | 13.009        | 13.687  |
| 423.15                                                                 | 9.622            | 19.875                          | 18.807            | 12.975        | 17.161 | 13.139        | 14.195  |
| 433.15                                                                 | 8.548            | 17.697                          | 16.005            | 9.842         | 15.043 | 14.366        | 12.628  |

|        |       |        |        |       |        |        |        |
|--------|-------|--------|--------|-------|--------|--------|--------|
| 443.15 | 5.562 | 14.849 | 14.031 | 7.101 | 11.750 | 12.211 | 9.983  |
| 453.15 | 6.883 | 15.433 | 14.892 | 7.366 | 11.880 | 12.355 | 11.138 |
| 463.15 | 8.179 | 16.389 | 16.175 | 8.339 | 12.549 | 12.883 | 11.825 |
| 473.15 | 8.812 | 16.525 | 16.477 | 8.298 | 12.238 | 12.504 | 11.793 |

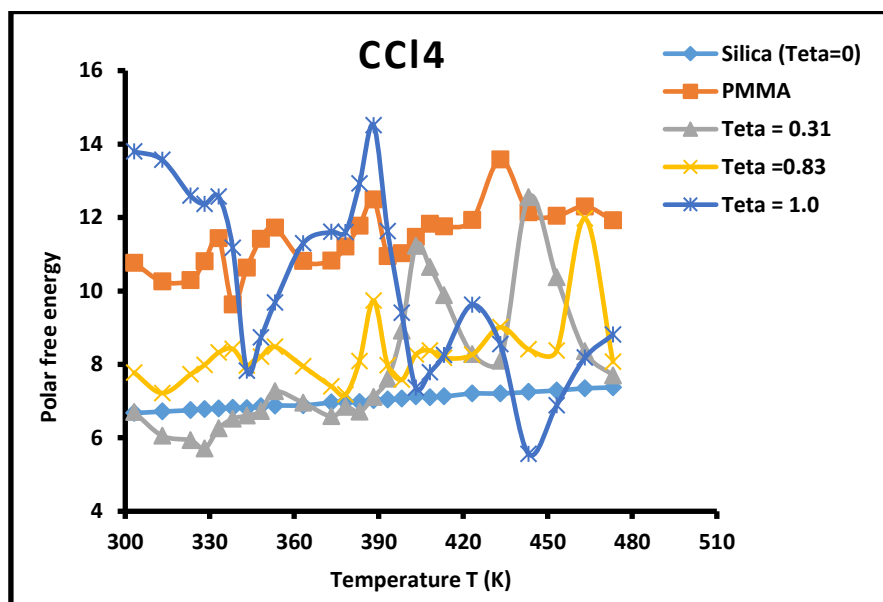

**Figure S1.** Variations of the polar free interaction energy of CCl<sub>4</sub> adsorbed on PMMA/silica a function of the temperature, at different recovery fractions.

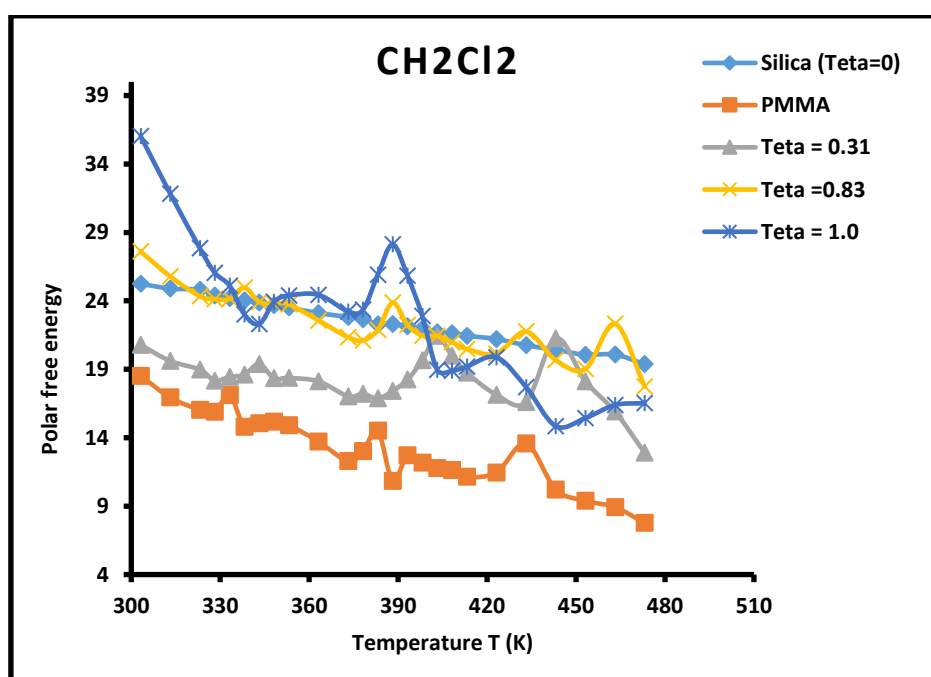

**Figure S2.** Variations of the polar free interaction energy of CH<sub>2</sub>Cl<sub>2</sub> adsorbed on PMMA/silica a function of the temperature, at different recovery fractions.

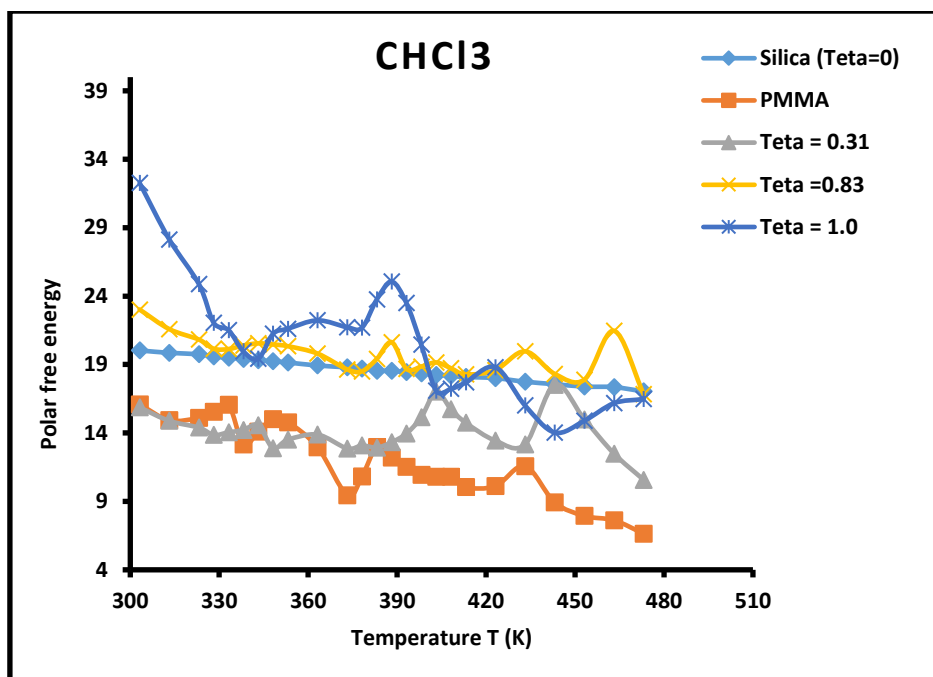

**Figure S3.** Variations of the polar free interaction energy of CHCl<sub>3</sub> adsorbed on PMMA/silica as a function of the temperature, at different recovery fractions.

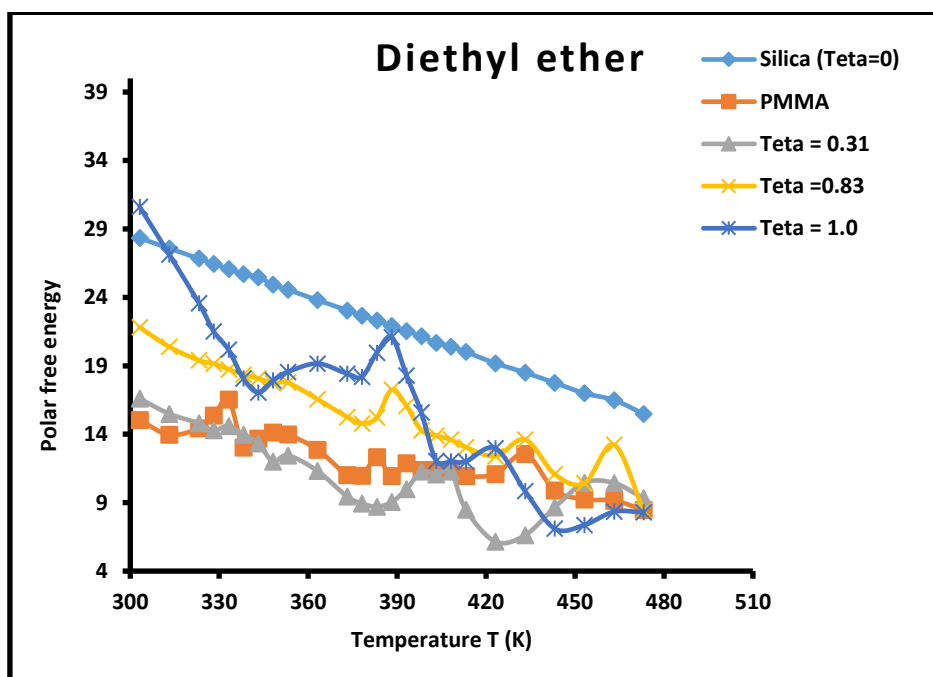

**Figure S4.** Variations of the polar free interaction energy of diethyl ether adsorbed on PMMA/silica as a function of the temperature, at different recovery fractions.

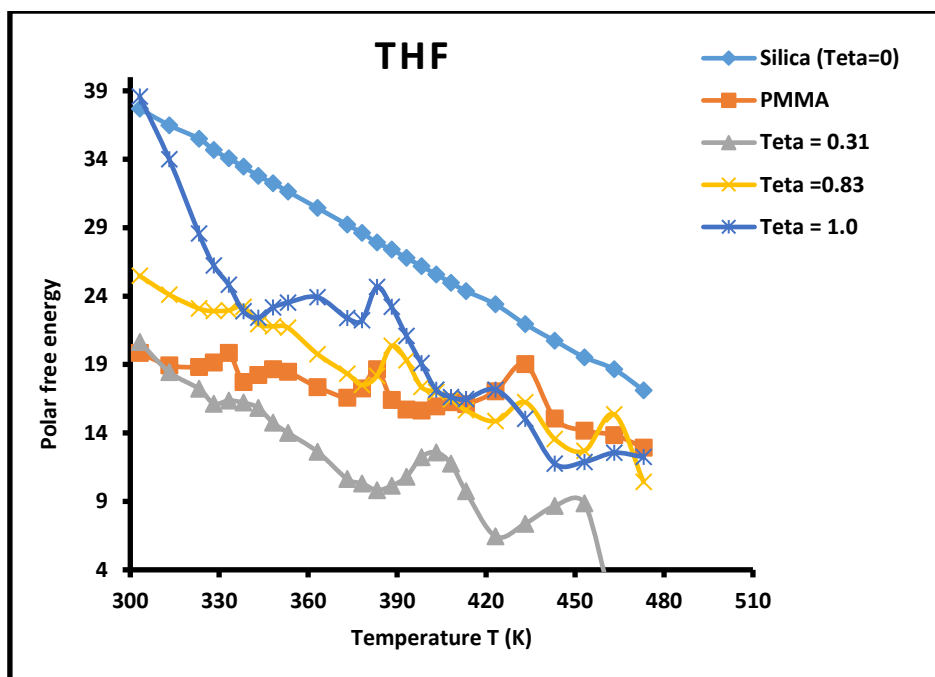

**Figure S5.** Variations of the polar free interaction energy of THF adsorbed on PMMA/silica as a function of the temperature, at different recovery fractions.

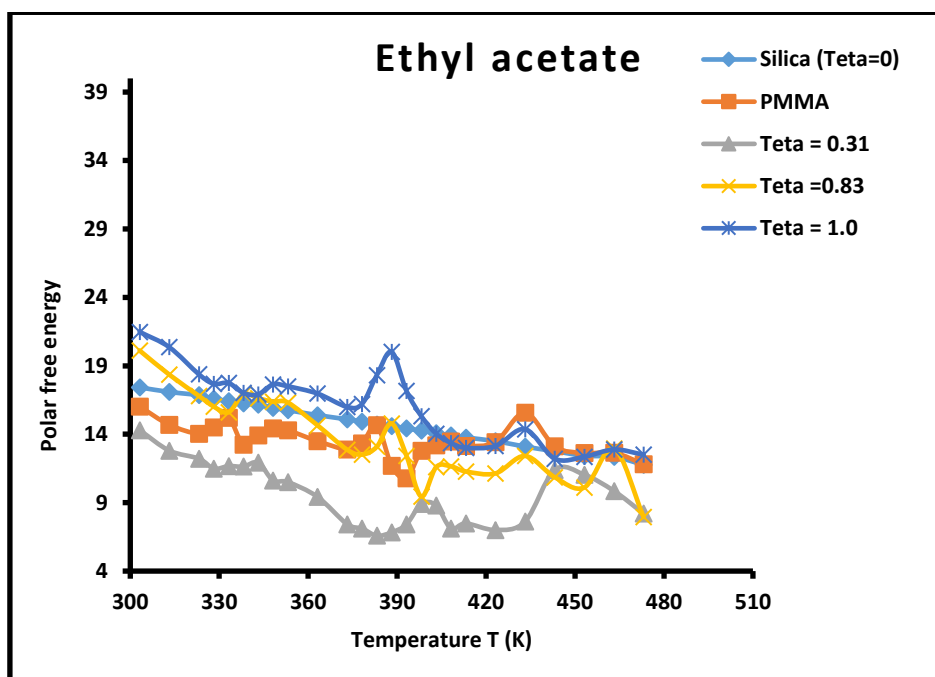

**Figure S6.** Variations of the polar free interaction energy of ethyl acetate adsorbed on PMMA/silica as a function of the temperature, at different recovery fractions.



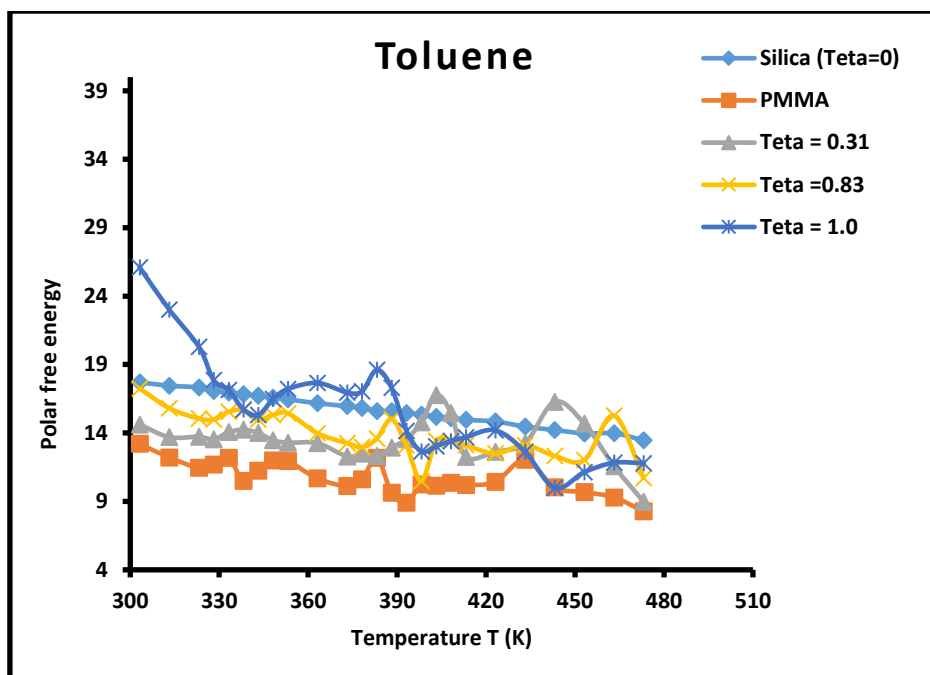

**Figure S7.** Variations of the polar free interaction energy of toluene adsorbed on PMMA/silica as a function of the temperature, at different recovery fractions.

**Table S9.** Values (in kJ/mol) of polar enthalpy ( $-\Delta H_a^p(T)$ ) and ( $-\Delta S_a^p(T)$ ) of polar solvents adsorbed on PMMA particles at different temperatures.

| T(K)   | $(-\Delta H_a^p(T))$ (kJ/mol) of PMMA |          |          |               |          |               | Toluene  |
|--------|---------------------------------------|----------|----------|---------------|----------|---------------|----------|
|        | CCl4                                  | CH2Cl2   | CHCl3    | Diethyl ether | THF      | Ethyl acetate |          |
| 303.15 | 43.650                                | 96.121   | 66.440   | 76.111        | 62.070   | 85.500        | 64.250   |
| 313.15 | 18.382                                | 53.596   | 34.393   | 27.423        | 31.872   | 47.290        | 37.133   |
| 323.15 | -7.706                                | 9.691    | 1.305    | -22.845       | 0.693    | 7.839         | 9.136    |
| 328.15 | -21.058                               | -12.779  | -15.629  | -48.571       | -15.264  | -12.351       | -5.193   |
| 333.15 | -34.615                               | -35.594  | -32.822  | -74.692       | -31.466  | -32.851       | -19.741  |
| 338.15 | -77.626                               | -18.584  | -92.255  | -51.103       | -37.851  | -49.305       | -66.791  |
| 343.15 | -47.308                               | -0.870   | -51.377  | -26.576       | -14.687  | -27.163       | -36.133  |
| 348.15 | -16.545                               | 17.104   | -9.899   | -1.689        | 8.817    | -4.695        | -5.024   |
| 353.15 | 14.663                                | 35.338   | 32.179   | 23.557        | 32.661   | 18.097        | 26.534   |
| 363.15 | 78.414                                | 72.585   | 118.135  | 75.131        | 81.370   | 64.656        | 91.001   |
| 373.15 | -9.177                                | -8.062   | -62.810  | 72.882        | -10.842  | 13.663        | 12.572   |
| 378.15 | -22.701                               | -65.161  | -120.660 | -33.427       | -66.062  | -53.954       | -68.944  |
| 383.15 | -36.404                               | -123.020 | -179.280 | -141.151      | -122.018 | -122.471      | -151.545 |
| 388.15 | 196.168                               | -233.768 | 70.944   | -121.742      | 91.509   | 200.631       | 147.591  |
| 393.15 | 69.988                                | -45.474  | 66.646   | -11.969       | 44.240   | -27.508       | -13.357  |
| 398.15 | -57.807                               | 145.229  | 62.294   | 99.208        | -3.633   | -258.568      | -176.365 |
| 403.15 | -41.190                               | 8.609    | -23.498  | 4.627         | -25.119  | -24.806       | -25.926  |
| 408.15 | -5.898                                | 37.005   | 37.755   | 35.457        | 13.012   | 21.844        | 4.498    |
| 413.15 | 29.828                                | 65.750   | 99.763   | 66.666        | 51.613   | 69.069        | 35.297   |
| 423.15 | -117.633                              | -202.173 | -139.848 | -144.642      | -200.139 | -179.314      | -141.682 |

|                                         |         |         |         |               |         |               |         |
|-----------------------------------------|---------|---------|---------|---------------|---------|---------------|---------|
| 433.15                                  | 15.093  | 31.597  | 36.550  | 32.612        | 54.182  | 17.635        | 14.164  |
| 443.15                                  | 150.920 | 270.826 | 217.068 | 214.006       | 314.443 | 219.184       | 173.651 |
| 453.15                                  | 12.047  | 9.388   | 7.939   | 9.244         | 14.165  | 12.620        | 9.682   |
| 463.15                                  | 12.299  | 8.917   | 7.617   | 9.151         | 13.848  | 12.645        | 9.287   |
| 473.15                                  | 11.924  | 7.776   | 6.642   | 8.470         | 12.938  | 11.811        | 8.280   |
| $(-\Delta S_a^p(T))$ (J/(K mol) of PMMA |         |         |         |               |         |               |         |
| T(K)                                    | CCl4    | CH2Cl2  | CHCl3   | Diethyl ether | THF     | Ethyl acetate | Toluene |
| 303.15                                  | 114.0   | 245.9   | 178.4   | 215.4         | 129.9   | 239.0         | 165.2   |
| 313.15                                  | 32.0    | 107.9   | 74.4    | 57.4          | 31.9    | 115.0         | 77.2    |
| 323.15                                  | -50.0   | -30.1   | -29.6   | -100.6        | -66.1   | -9.0          | -10.8   |
| 328.15                                  | -91.0   | -99.1   | -81.6   | -179.6        | -115.1  | -71.0         | -54.8   |
| 333.15                                  | -132.0  | -168.1  | -133.6  | -258.6        | -164.1  | -133.0        | -98.8   |
| 338.15                                  | -244.2  | -109.1  | -327.1  | -204.7        | -172.0  | -197.1        | -222.5  |
| 343.15                                  | -155.2  | -57.1   | -207.1  | -132.7        | -104.0  | -132.1        | -132.5  |
| 348.15                                  | -66.2   | -5.1    | -87.1   | -60.7         | -36.0   | -67.1         | -42.5   |
| 353.15                                  | 22.8    | 46.9    | 32.9    | 11.3          | 32.0    | -2.1          | 47.5    |
| 363.15                                  | 200.8   | 150.9   | 272.9   | 155.3         | 168.0   | 127.9         | 227.5   |
| 373.15                                  | -48.3   | -36.8   | -190.0  | 178.7         | -86.6   | 1.6           | 3.3     |
| 378.15                                  | -84.3   | -188.8  | -344.0  | -104.3        | -233.6  | -178.4        | -213.7  |
| 383.15                                  | -120.3  | -340.8  | -498.0  | -387.3        | -380.6  | -358.4        | -430.7  |
| 388.15                                  | 477.5   | -644.3  | 165.1   | -356.0        | 189.6   | 497.1         | 360.4   |
| 393.15                                  | 154.5   | -162.3  | 154.1   | -75.0         | 68.6    | -86.9         | -51.6   |
| 398.15                                  | -168.5  | 319.7   | 143.1   | 206.0         | -52.4   | -670.9        | -463.6  |
| 403.15                                  | -144.5  | -9.8    | -93.9   | -3.4          | -93.6   | -79.8         | -97.5   |
| 408.15                                  | -57.5   | 60.2    | 57.1    | 72.6          | 0.4     | 35.2          | -22.5   |
| 413.15                                  | 29.5    | 130.2   | 208.1   | 148.6         | 94.4    | 150.3         | 52.5    |
| 423.15                                  | -292.4  | -525.0  | -356.2  | -380.6        | -530.9  | -466.1        | -375.3  |
| 433.15                                  | 17.6    | 21.0    | 55.8    | 33.4          | 63.1    | -6.1          | -11.3   |
| 443.15                                  | 327.6   | 567.0   | 467.8   | 447.4         | 657.1   | 453.9         | 352.7   |
| 453.15                                  | -89.4   | 57.8    | 35.3    | -51.9         | 40.2    | -35.3         | 43.0    |
| 463.15                                  | -27.4   | 125.8   | 101.3   | 6.1           | 100.2   | 50.7          | 105.0   |
| 473.15                                  | 34.6    | 193.8   | 167.3   | 64.1          | 160.2   | 136.7         | 167.0   |

**Table S10.** Values (in kJ/mol) of polar enthalpy ( $-\Delta H_a^p(T)$ ) and ( $-\Delta S_a^p(T)$ ) of polar solvents adsorbed on PMMA/silica particles at different temperatures for a recovery fraction of 31%.

|                                                                  |        |        |        |               |        |               |         |
|------------------------------------------------------------------|--------|--------|--------|---------------|--------|---------------|---------|
| $(-\Delta H_a^p(T))$ (kJ/mol) of PMMA/silica for $\theta = 0.31$ |        |        |        |               |        |               |         |
| T(K)                                                             | CCl4   | CH2Cl2 | CHCl3  | Diethyl ether | THF    | Ethyl acetate | Toluene |
| 303.15                                                           | 40.240 | 63.260 | 53.000 | 64.210        | 94.190 | 67.620        | 47.560  |
| 313.15                                                           | 24.833 | 52.167 | 42.523 | 49.419        | 72.003 | 52.213        | 27.222  |
| 323.15                                                           | 8.925  | 40.713 | 31.706 | 34.148        | 49.097 | 36.305        | 6.224   |
| 328.15                                                           | 0.784  | 34.852 | 26.170 | 26.332        | 37.373 | 28.164        | -4.522  |
| 333.15                                                           | -7.482 | 28.900 | 20.549 | 18.397        | 25.470 | 19.898        | -15.433 |

|        |          |          |          |          |          |          |          |
|--------|----------|----------|----------|----------|----------|----------|----------|
| 338.15 | -18.357  | 24.452   | 62.357   | 70.492   | 67.402   | 42.997   | 44.226   |
| 343.15 | -12.907  | 26.496   | 45.666   | 61.635   | 67.334   | 45.723   | 36.391   |
| 348.15 | -7.377   | 28.570   | 28.729   | 52.648   | 67.265   | 48.488   | 28.441   |
| 353.15 | -1.766   | 30.674   | 11.547   | 43.531   | 67.195   | 51.293   | 20.376   |
| 363.15 | 9.695    | 34.972   | -23.552  | 24.907   | 67.051   | 57.023   | 3.901    |
| 373.15 | -28.621  | -16.518  | -23.265  | 59.479   | 23.503   | 27.026   | -17.893  |
| 378.15 | 0.680    | 22.173   | 3.781    | 39.194   | 36.651   | 43.179   | 10.281   |
| 383.15 | 30.371   | 61.380   | 31.188   | 18.639   | 49.974   | 59.547   | 38.829   |
| 388.15 | -0.265   | -28.095  | -11.267  | -47.037  | -6.937   | -1.020   | -7.689   |
| 393.15 | -63.941  | -73.020  | -53.066  | -73.992  | -67.487  | -72.118  | -56.130  |
| 398.15 | -128.432 | -118.519 | -95.401  | -101.292 | -128.813 | -144.126 | -105.190 |
| 403.15 | 49.990   | 142.208  | 124.926  | -120.458 | 33.918   | 226.173  | 51.337   |
| 408.15 | 66.216   | 124.360  | 101.399  | 122.527  | 131.274  | 59.857   | 205.484  |
| 413.15 | 82.642   | 106.291  | 77.581   | 368.506  | 229.830  | -108.510 | 361.531  |
| 423.15 | 120.203  | 141.446  | 113.708  | 22.464   | -30.866  | 49.716   | 38.623   |
| 433.15 | -78.459  | -81.192  | -84.097  | -44.328  | -47.136  | -85.579  | -64.989  |
| 443.15 | -281.761 | -309.030 | -286.522 | -112.679 | -63.786  | -224.034 | -171.021 |
| 453.15 | 129.355  | 107.784  | 1339.890 | -6.168   | 482.666  | 47.633   | 161.618  |
| 463.15 | 67.046   | 145.352  | 1366.463 | 45.144   | 192.199  | 68.708   | 138.710  |
| 473.15 | 3.378    | 183.741  | 1393.616 | 97.577   | -104.608 | 90.243   | 115.303  |

( $-\Delta S_a^p(T)$ ) (J/(K mol) of PMMA/silica for  $\theta = 0.31$ )

| T(K)   | CCl4   | CH2Cl2 | CHCl3  | Diethyl ether | THF    | Ethyl acetate | Toluene |
|--------|--------|--------|--------|---------------|--------|---------------|---------|
| 303.15 | 125.7  | 143.1  | 129.6  | 168.8         | 230.2  | 186.3         | 99.5    |
| 313.15 | 75.7   | 107.1  | 95.6   | 120.8         | 158.2  | 136.3         | 33.5    |
| 323.15 | 25.6   | 71.1   | 61.6   | 72.8          | 86.2   | 86.2          | -32.5   |
| 328.15 | 0.7    | 53.1   | 44.6   | 48.8          | 50.2   | 61.3          | -65.5   |
| 333.15 | -24.3  | 35.1   | 27.6   | 24.8          | 14.2   | 36.3          | -98.5   |
| 338.15 | -82.7  | 15.3   | 136.5  | 167.0         | 152.0  | 105.7         | 77.9    |
| 343.15 | -66.7  | 21.3   | 87.5   | 141.0         | 151.8  | 113.7         | 54.9    |
| 348.15 | -50.7  | 27.3   | 38.5   | 115.0         | 151.6  | 121.7         | 31.9    |
| 353.15 | -34.7  | 33.3   | -10.5  | 89.0          | 151.4  | 129.7         | 8.9     |
| 363.15 | -2.7   | 45.3   | -108.5 | 37.0          | 151.0  | 145.7         | -37.1   |
| 373.15 | -97.9  | -91.9  | -115.0 | 140.9         | 23.6   | 64.6          | -82.2   |
| 378.15 | -19.9  | 11.1   | -43.0  | 86.9          | 58.5   | 107.6         | -7.2    |
| 383.15 | 58.1   | 114.1  | 29.0   | 32.9          | 93.6   | 150.6         | 67.8    |
| 388.15 | -20.7  | -125.5 | -51.2  | -136.1        | -33.6  | -14.7         | -46.8   |
| 393.15 | -183.7 | -240.5 | -158.2 | -205.1        | -188.6 | -196.7        | -170.8  |
| 398.15 | -346.7 | -355.5 | -265.2 | -274.1        | -343.6 | -378.7        | -294.8  |
| 403.15 | 97.3   | 288.8  | 251.6  | -311.6        | 62.2   | 536.7         | 99.4    |
| 408.15 | 137.3  | 244.8  | 193.6  | 287.4         | 302.2  | 126.7         | 479.4   |
| 413.15 | 177.3  | 200.8  | 135.6  | 886.4         | 542.2  | -283.3        | 859.4   |
| 423.15 | 277.8  | 275.2  | 217.5  | 46.0          | -102.6 | 105.5         | 62.8    |
| 433.15 | -186.2 | -244.8 | -244.5 | -110.0        | -140.6 | -210.5        | -179.2  |

|        |        |        |        |        |        |        |        |
|--------|--------|--------|--------|--------|--------|--------|--------|
| 443.15 | -650.2 | -764.8 | -706.5 | -266.0 | -178.6 | -526.5 | -421.2 |
| 453.15 | 255.8  | 215.9  | 311.0  | -18.2  | 1044.3 | 66.0   | 313.8  |
| 463.15 | 119.8  | 297.9  | 253.0  | 93.8   | 410.3  | 112.0  | 263.8  |
| 473.15 | -16.2  | 379.9  | 195.0  | 205.8  | -223.7 | 158.0  | 213.8  |

**Table S11.** Values (in kJ/mol) of polar enthalpy ( $-\Delta H_a^p(T)$ ) and ( $-\Delta S_a^p(T)$ ) of polar solvents adsorbed on PMMA/silica for  $\theta = 0.83$  at different temperatures.

| $(-\Delta H_a^p(T))$ (kJ/mol) of PMMA/silica for $\theta = 0.83$    |          |          |          |               |          |               |          |
|---------------------------------------------------------------------|----------|----------|----------|---------------|----------|---------------|----------|
| T(K)                                                                | CCl4     | CH2Cl2   | CHCl3    | Diethyl ether | THF      | Ethyl acetate | Toluene  |
| 303.15                                                              | 30.470   | 103.020  | 66.140   | 66.760        | 84.220   | 77.910        | 83.240   |
| 313.15                                                              | 13.214   | 77.752   | 53.814   | 55.050        | 65.115   | 68.666        | 53.042   |
| 323.15                                                              | -4.603   | 51.664   | 41.088   | 42.961        | 45.390   | 59.121        | 21.863   |
| 328.15                                                              | -13.721  | 38.312   | 34.575   | 36.773        | 35.294   | 54.236        | 5.906    |
| 333.15                                                              | -22.979  | 24.755   | 27.962   | 30.491        | 25.044   | 49.277        | -10.296  |
| 338.15                                                              | -0.192   | 51.232   | 13.685   | 28.422        | 52.813   | 16.204        | 9.255    |
| 343.15                                                              | 2.192    | 49.869   | 20.839   | 34.553        | 56.560   | 28.467        | 20.156   |
| 348.15                                                              | 4.612    | 48.487   | 28.098   | 40.775        | 60.362   | 40.910        | 31.217   |
| 353.15                                                              | 7.066    | 47.084   | 35.461   | 47.087        | 64.219   | 53.534        | 42.438   |
| 363.15                                                              | 12.081   | 44.219   | 50.504   | 59.980        | 72.099   | 79.321        | 65.359   |
| 373.15                                                              | 64.731   | 78.178   | 64.065   | 85.487        | 132.221  | 74.919        | 67.967   |
| 378.15                                                              | -20.541  | 4.551    | -14.446  | 18.246        | 20.277   | 5.048         | -1.153   |
| 383.15                                                              | -106.949 | -70.057  | -94.002  | -49.890       | -93.157  | -65.753       | -71.192  |
| 388.15                                                              | 204.970  | 185.373  | 253.266  | 87.057        | 59.188   | 171.457       | 135.848  |
| 393.15                                                              | 98.323   | 118.962  | 86.849   | 134.716       | 129.505  | 219.116       | 189.367  |
| 398.15                                                              | -9.689   | 51.702   | -81.698  | 182.986       | 200.722  | 267.386       | 243.571  |
| 403.15                                                              | -7.961   | 53.616   | 49.769   | 28.460        | 52.399   | -12.743       | -5.556   |
| 408.15                                                              | 17.594   | 56.455   | 52.203   | 48.742        | 73.898   | 22.143        | 20.812   |
| 413.15                                                              | 43.465   | 59.330   | 54.667   | 69.275        | 95.662   | 57.459        | 47.504   |
| 423.15                                                              | -58.125  | -129.765 | -100.056 | -114.149      | -121.359 | -94.606       | -45.114  |
| 433.15                                                              | -0.753   | 28.650   | 29.246   | 46.836        | 53.326   | 26.989        | 13.971   |
| 443.15                                                              | 57.959   | 190.766  | 161.567  | 211.580       | 232.091  | 151.423       | 74.435   |
| 453.15                                                              | -332.165 | -307.410 | -320.758 | -280.024      | -281.058 | -306.479      | -304.948 |
| 463.15                                                              | 11.447   | 53.612   | 54.925   | 70.003        | 68.052   | 52.711        | 52.409   |
| 473.15                                                              | 362.560  | 422.514  | 438.808  | 427.669       | 424.782  | 419.740       | 417.566  |
| $(-\Delta S_a^p(T))$ (J/(K mol)) of PMMA/silica for $\theta = 0.83$ |          |          |          |               |          |               |          |
| T(K)                                                                | CCl4     | CH2Cl2   | CHCl3    | Diethyl ether | THF      | Ethyl acetate | Toluene  |
| 303.15                                                              | 87.5     | 254.6    | 128.3    | 140.3         | 206.5    | 183.9         | 225.1    |
| 313.15                                                              | 31.5     | 172.6    | 88.3     | 102.3         | 144.5    | 153.9         | 127.1    |
| 323.15                                                              | -24.5    | 90.6     | 48.3     | 64.3          | 82.5     | 123.9         | 29.1     |
| 328.15                                                              | -52.5    | 49.6     | 28.3     | 45.3          | 51.5     | 108.9         | -19.9    |
| 333.15                                                              | -80.5    | 8.6      | 8.3      | 26.3          | 20.5     | 93.9          | -68.9    |
| 338.15                                                              | -40.4    | 63.6     | -12.7    | 36.6          | 82.2     | 1.2           | -10.3    |

|        |        |        |        |        |        |        |        |
|--------|--------|--------|--------|--------|--------|--------|--------|
| 343.15 | -33.4  | 59.6   | 8.3    | 54.6   | 93.2   | 37.2   | 21.7   |
| 348.15 | -26.4  | 55.6   | 29.3   | 72.6   | 104.2  | 73.2   | 53.7   |
| 353.15 | -19.4  | 51.6   | 50.3   | 90.6   | 115.2  | 109.2  | 85.7   |
| 363.15 | -5.4   | 43.6   | 92.3   | 126.6  | 137.2  | 181.2  | 149.7  |
| 373.15 | 149.0  | -161.5 | 111.3  | 193.2  | 295.3  | 167.8  | 143.1  |
| 378.15 | -78.0  | 34.5   | -97.7  | 14.2   | -2.7   | -18.2  | -40.9  |
| 383.15 | -305.0 | 230.5  | -306.7 | -164.8 | -300.7 | -204.2 | -224.9 |
| 388.15 | 517.0  | 419.9  | 594.6  | 185.0  | 81.4   | 395.2  | 305.3  |
| 393.15 | 244.0  | 249.9  | 168.6  | 307.0  | 261.4  | 517.2  | 442.3  |
| 398.15 | -29.0  | 79.9   | -257.4 | 429.0  | 441.4  | 639.2  | 579.3  |
| 403.15 | -26.8  | 72.2   | 70.1   | 38.4   | 94.5   | -66.3  | -58.9  |
| 408.15 | 36.2   | 79.2   | 76.1   | 88.4   | 147.5  | 19.7   | 6.1    |
| 413.15 | 99.2   | 86.2   | 82.1   | 138.4  | 200.5  | 105.7  | 71.1   |
| 423.15 | -171.5 | -361.5 | -272.9 | -288.6 | -302.5 | -230.5 | -142.8 |
| 433.15 | -37.5  | 8.5    | 29.1   | 87.4   | 105.5  | 53.5   | -4.8   |
| 443.15 | 96.5   | 378.5  | 331.1  | 463.4  | 513.5  | 337.5  | 133.2  |
| 453.15 | -767.8 | -716.8 | -728.7 | -619.3 | -649.0 | -721.0 | -685.3 |
| 463.15 | -17.7  | 71.2   | 91.3   | 144.7  | 113.0  | 63.0   | 94.7   |
| 473.15 | 732.3  | 859.2  | 911.3  | 908.7  | 875.0  | 847.0  | 874.7  |

**Table S12.** Values (in kJ/mol) of polar enthalpy ( $-\Delta H_a^p(T)$ ) and ( $-\Delta S_a^p(T)$ ) of polar solvents adsorbed on PMMA/silica for  $\theta = 1.0$  (monolayer) at different temperatures.

| $(-\Delta H_a^p(T))$ (kJ/mol) of PMMA/silica for $\theta = 1.0$ (monolayer) |         |          |          |               |          |               |          |
|-----------------------------------------------------------------------------|---------|----------|----------|---------------|----------|---------------|----------|
| T(K)                                                                        | CCl4    | CH2Cl2   | CHCl3    | Diethyl ether | THF      | Ethyl acetate | Toluene  |
| 303.15                                                                      | 43.650  | 96.121   | 66.440   | 76.111        | 62.070   | 85.500        | 64.250   |
| 313.15                                                                      | 18.382  | 53.596   | 34.393   | 27.423        | 31.872   | 47.290        | 37.133   |
| 323.15                                                                      | -7.706  | 9.691    | 1.305    | -22.845       | 0.693    | 7.839         | 9.136    |
| 328.15                                                                      | -21.058 | -12.779  | -15.629  | -48.571       | -15.264  | -12.351       | -5.193   |
| 333.15                                                                      | -34.615 | -35.594  | -32.822  | -74.692       | -31.466  | -32.851       | -19.741  |
| 338.15                                                                      | -77.626 | -18.584  | -92.255  | -51.103       | -37.851  | -49.305       | -66.791  |
| 343.15                                                                      | -47.308 | -0.870   | -51.377  | -26.576       | -14.687  | -27.163       | -36.133  |
| 348.15                                                                      | -16.545 | 17.104   | -9.899   | -1.689        | 8.817    | -4.695        | -5.024   |
| 353.15                                                                      | 14.663  | 35.338   | 32.179   | 23.557        | 32.661   | 18.097        | 26.534   |
| 363.15                                                                      | 78.414  | 72.585   | 118.135  | 75.131        | 81.370   | 64.656        | 91.001   |
| 373.15                                                                      | -9.177  | -8.062   | -62.810  | 72.882        | -10.842  | 13.663        | 12.572   |
| 378.15                                                                      | -22.701 | -65.161  | -120.660 | -33.427       | -66.062  | -53.954       | -68.944  |
| 383.15                                                                      | -36.404 | -123.020 | -179.280 | -141.151      | -122.018 | -122.471      | -151.545 |
| 388.15                                                                      | 196.168 | -233.768 | 70.944   | -121.742      | 91.509   | 200.631       | 147.591  |
| 393.15                                                                      | 69.988  | -45.474  | 66.646   | -11.969       | 44.240   | -27.508       | -13.357  |
| 398.15                                                                      | -57.807 | 145.229  | 62.294   | 99.208        | -3.633   | -258.568      | -176.365 |
| 403.15                                                                      | -41.190 | 8.609    | -23.498  | 4.627         | -25.119  | -24.806       | -25.926  |
| 408.15                                                                      | -5.898  | 37.005   | 37.755   | 35.457        | 13.012   | 21.844        | 4.498    |

|                                                                                |          |          |          |               |          |               |          |
|--------------------------------------------------------------------------------|----------|----------|----------|---------------|----------|---------------|----------|
| 413.15                                                                         | 29.828   | 65.750   | 99.763   | 66.666        | 51.613   | 69.069        | 35.297   |
| 423.15                                                                         | -117.633 | -202.173 | -139.848 | -144.642      | -200.139 | -179.314      | -141.682 |
| 433.15                                                                         | 15.093   | 31.597   | 36.550   | 32.612        | 54.182   | 17.635        | 14.164   |
| 443.15                                                                         | 150.920  | 270.826  | 217.068  | 214.006       | 314.443  | 219.184       | 173.651  |
| 453.15                                                                         | 12.047   | 9.388    | 7.939    | 9.244         | 14.165   | 12.620        | 9.682    |
| 463.15                                                                         | 12.299   | 8.917    | 7.617    | 9.151         | 13.848   | 12.645        | 9.287    |
| 473.15                                                                         | 11.924   | 7.776    | 6.642    | 8.470         | 12.938   | 11.811        | 8.280    |
| ( $-\Delta S_a^p(T)$ (J/(K mol) of PMMA/silica for $\theta = 1.0$ (monolayer)) |          |          |          |               |          |               |          |
| T(K)                                                                           | CCl4     | CH2Cl2   | CHCl3    | Diethyl ether | THF      | Ethyl acetate | Toluene  |
| 303.15                                                                         | 114.0    | 245.9    | 178.4    | 215.4         | 129.9    | 239.0         | 165.2    |
| 313.15                                                                         | 32.0     | 107.9    | 74.4     | 57.4          | 31.9     | 115.0         | 77.2     |
| 323.15                                                                         | -50.0    | -30.1    | -29.6    | -100.6        | -66.1    | -9.0          | -10.8    |
| 328.15                                                                         | -91.0    | -99.1    | -81.6    | -179.6        | -115.1   | -71.0         | -54.8    |
| 333.15                                                                         | -132.0   | -168.1   | -133.6   | -258.6        | -164.1   | -133.0        | -98.8    |
| 338.15                                                                         | -244.2   | -109.1   | -327.1   | -204.7        | -172.0   | -197.1        | -222.5   |
| 343.15                                                                         | -155.2   | -57.1    | -207.1   | -132.7        | -104.0   | -132.1        | -132.5   |
| 348.15                                                                         | -66.2    | -5.1     | -87.1    | -60.7         | -36.0    | -67.1         | -42.5    |
| 353.15                                                                         | 22.8     | 46.9     | 32.9     | 11.3          | 32.0     | -2.1          | 47.5     |
| 363.15                                                                         | 200.8    | 150.9    | 272.9    | 155.3         | 168.0    | 127.9         | 227.5    |
| 373.15                                                                         | -48.3    | -36.8    | -190.0   | 178.7         | -86.6    | 1.6           | 3.3      |
| 378.15                                                                         | -84.3    | -188.8   | -344.0   | -104.3        | -233.6   | -178.4        | -213.7   |
| 383.15                                                                         | -120.3   | -340.8   | -498.0   | -387.3        | -380.6   | -358.4        | -430.7   |
| 388.15                                                                         | 477.5    | -644.3   | 165.1    | -356.0        | 189.6    | 497.1         | 360.4    |
| 393.15                                                                         | 154.5    | -162.3   | 154.1    | -75.0         | 68.6     | -86.9         | -51.6    |
| 398.15                                                                         | -168.5   | 319.7    | 143.1    | 206.0         | -52.4    | -670.9        | -463.6   |
| 403.15                                                                         | -144.5   | -9.8     | -93.9    | -3.4          | -93.6    | -79.8         | -97.5    |
| 408.15                                                                         | -57.5    | 60.2     | 57.1     | 72.6          | 0.4      | 35.2          | -22.5    |
| 413.15                                                                         | 29.5     | 130.2    | 208.1    | 148.6         | 94.4     | 150.3         | 52.5     |
| 423.15                                                                         | -292.4   | -525.0   | -356.2   | -380.6        | -530.9   | -466.1        | -375.3   |
| 433.15                                                                         | 17.6     | 21.0     | 55.8     | 33.4          | 63.1     | -6.1          | -11.3    |
| 443.15                                                                         | 327.6    | 567.0    | 467.8    | 447.4         | 657.1    | 453.9         | 352.7    |
| 453.15                                                                         | -89.4    | 57.8     | 35.3     | -51.9         | 40.2     | -35.3         | 43.0     |
| 463.15                                                                         | -27.4    | 125.8    | 101.3    | 6.1           | 100.2    | 50.7          | 105.0    |
| 473.15                                                                         | 34.6     | 193.8    | 167.3    | 64.1          | 160.2    | 136.7         | 167.0    |

**Table S13.** Values (in kJ/mol) of polar enthalpy ( $-\Delta H_a^p(T)$ ) and ( $-\Delta S_a^p(T)$ ) of polar solvents adsorbed on silica particles at different temperatures.

|                                         |        |        |        |               |        |               |         |
|-----------------------------------------|--------|--------|--------|---------------|--------|---------------|---------|
| ( $-\Delta H_a^p(T)$ (kJ/mol) of silica |        |        |        |               |        |               |         |
| T(K)                                    | CCl4   | CH2Cl2 | CHCl3  | Diethyl ether | THF    | Ethyl acetate | Toluene |
| 303.15                                  | 35.700 | 25.365 | 51.255 | 74.408        | 27.517 | 25.249        | 35.700  |
| 313.15                                  | 35.700 | 25.365 | 51.255 | 74.408        | 27.517 | 25.249        | 35.700  |
| 323.15                                  | 35.700 | 25.365 | 51.255 | 74.408        | 27.517 | 25.249        | 35.700  |

|        |        |        |        |        |        |        |        |
|--------|--------|--------|--------|--------|--------|--------|--------|
| 328.15 | 35.700 | 25.365 | 51.255 | 74.408 | 27.517 | 25.249 | 35.700 |
| 333.15 | 35.700 | 25.365 | 51.255 | 74.408 | 27.517 | 25.249 | 35.700 |
| 338.15 | 35.700 | 25.365 | 51.255 | 74.408 | 27.517 | 25.249 | 35.700 |
| 343.15 | 35.700 | 25.365 | 51.255 | 74.408 | 27.517 | 25.249 | 35.700 |
| 348.15 | 35.700 | 25.365 | 51.255 | 74.408 | 27.517 | 25.249 | 35.700 |
| 353.15 | 35.700 | 25.365 | 51.255 | 74.408 | 27.517 | 25.249 | 35.700 |
| 363.15 | 35.700 | 25.365 | 51.255 | 74.408 | 27.517 | 25.249 | 35.700 |
| 373.15 | 35.700 | 25.365 | 51.255 | 74.408 | 27.517 | 25.249 | 35.700 |
| 378.15 | 35.700 | 25.365 | 51.255 | 74.408 | 27.517 | 25.249 | 35.700 |
| 383.15 | 35.700 | 25.365 | 51.255 | 74.408 | 27.517 | 25.249 | 35.700 |
| 388.15 | 35.700 | 25.365 | 51.255 | 74.408 | 27.517 | 25.249 | 35.700 |
| 393.15 | 35.700 | 25.365 | 51.255 | 74.408 | 27.517 | 25.249 | 35.700 |
| 398.15 | 35.700 | 25.365 | 51.255 | 74.408 | 27.517 | 25.249 | 35.700 |
| 403.15 | 35.700 | 25.365 | 51.255 | 74.408 | 27.517 | 25.249 | 35.700 |
| 408.15 | 35.700 | 25.365 | 51.255 | 74.408 | 27.517 | 25.249 | 35.700 |
| 413.15 | 35.700 | 25.365 | 51.255 | 74.408 | 27.517 | 25.249 | 35.700 |
| 423.15 | 35.700 | 25.365 | 51.255 | 74.408 | 27.517 | 25.249 | 35.700 |
| 433.15 | 35.700 | 25.365 | 51.255 | 74.408 | 27.517 | 25.249 | 35.700 |
| 443.15 | 35.700 | 25.365 | 51.255 | 74.408 | 27.517 | 25.249 | 35.700 |
| 453.15 | 35.700 | 25.365 | 51.255 | 74.408 | 27.517 | 25.249 | 35.700 |
| 463.15 | 35.700 | 25.365 | 51.255 | 74.408 | 27.517 | 25.249 | 35.700 |
| 473.15 | 35.700 | 25.365 | 51.255 | 74.408 | 27.517 | 25.249 | 35.700 |

$(-\Delta S_a^p(T))$  (J/(K mol) of silica

| T(K)   | CCl4 | CH2Cl2 | CHCl3 | Diethyl ether | THF   | Ethyl acetate | Toluene |
|--------|------|--------|-------|---------------|-------|---------------|---------|
| 303.15 | -4.1 | 34.5   | 17.6  | 75.6          | 121.1 | 33.3          | 24.9    |
| 313.15 | -4.1 | 34.5   | 17.6  | 75.6          | 121.1 | 33.3          | 24.9    |
| 323.15 | -4.1 | 34.5   | 17.6  | 75.6          | 121.1 | 33.3          | 24.9    |
| 328.15 | -4.1 | 34.5   | 17.6  | 75.6          | 121.1 | 33.3          | 24.9    |
| 333.15 | -4.1 | 34.5   | 17.6  | 75.6          | 121.1 | 33.3          | 24.9    |
| 338.15 | -4.1 | 34.5   | 17.6  | 75.6          | 121.1 | 33.3          | 24.9    |
| 343.15 | -4.1 | 34.5   | 17.6  | 75.6          | 121.1 | 33.3          | 24.9    |
| 348.15 | -4.1 | 34.5   | 17.6  | 75.6          | 121.1 | 33.3          | 24.9    |
| 353.15 | -4.1 | 34.5   | 17.6  | 75.6          | 121.1 | 33.3          | 24.9    |
| 363.15 | -4.1 | 34.5   | 17.6  | 75.6          | 121.1 | 33.3          | 24.9    |
| 373.15 | -4.1 | 34.5   | 17.6  | 75.6          | 121.1 | 33.3          | 24.9    |
| 378.15 | -4.1 | 34.5   | 17.6  | 75.6          | 121.1 | 33.3          | 24.9    |
| 383.15 | -4.1 | 34.5   | 17.6  | 75.6          | 121.1 | 33.3          | 24.9    |
| 388.15 | -4.1 | 34.5   | 17.6  | 75.6          | 121.1 | 33.3          | 24.9    |
| 393.15 | -4.1 | 34.5   | 17.6  | 75.6          | 121.1 | 33.3          | 24.9    |
| 398.15 | -4.1 | 34.5   | 17.6  | 75.6          | 121.1 | 33.3          | 24.9    |
| 403.15 | -4.1 | 34.5   | 17.6  | 75.6          | 121.1 | 33.3          | 24.9    |
| 408.15 | -4.1 | 34.5   | 17.6  | 75.6          | 121.1 | 33.3          | 24.9    |
| 413.15 | -4.1 | 34.5   | 17.6  | 75.6          | 121.1 | 33.3          | 24.9    |

|        |      |      |      |      |       |      |      |
|--------|------|------|------|------|-------|------|------|
| 423.15 | -4.1 | 34.5 | 17.6 | 75.6 | 121.1 | 33.3 | 24.9 |
| 433.15 | -4.1 | 34.5 | 17.6 | 75.6 | 121.1 | 33.3 | 24.9 |
| 443.15 | -4.1 | 34.5 | 17.6 | 75.6 | 121.1 | 33.3 | 24.9 |
| 453.15 | -4.1 | 34.5 | 17.6 | 75.6 | 121.1 | 33.3 | 24.9 |
| 463.15 | -4.1 | 34.5 | 17.6 | 75.6 | 121.1 | 33.3 | 24.9 |
| 473.15 | -4.1 | 34.5 | 17.6 | 75.6 | 121.1 | 33.3 | 24.9 |

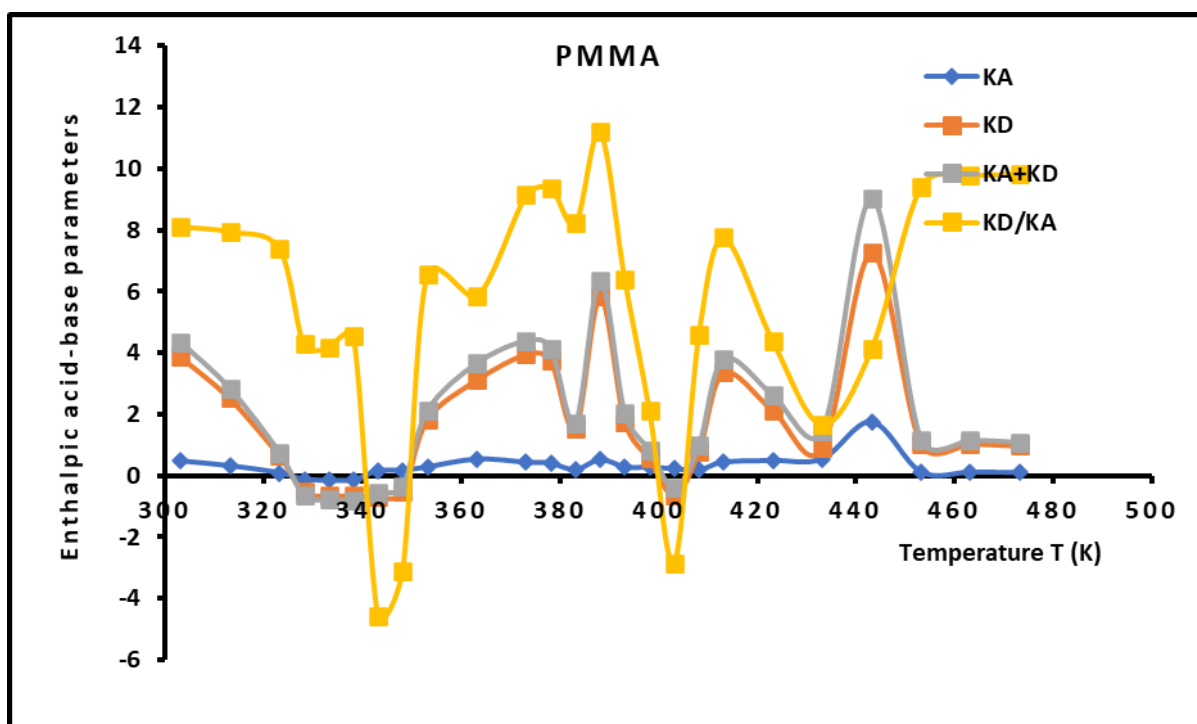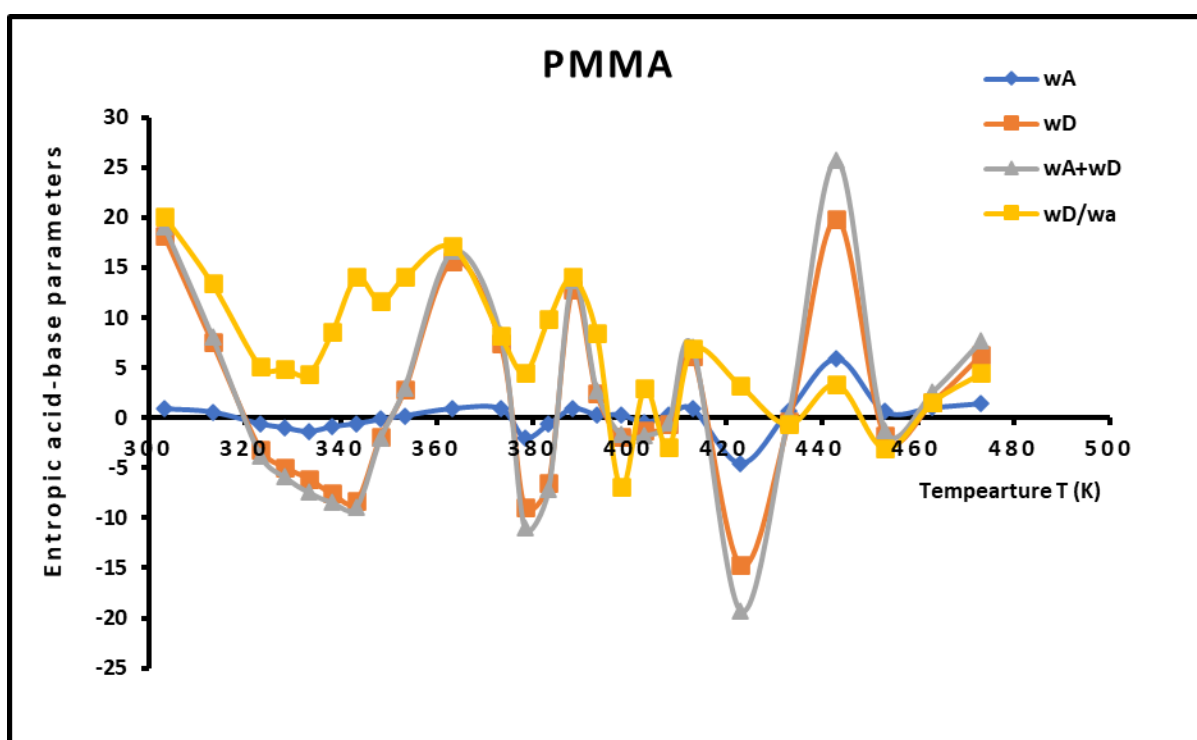



**Figure S8.** Evolutions of the enthalpic acid base parameters  $K_A$ ,  $K_D$ ,  $K_D/K_A$  and  $K_D + K_A$ , and the entropic acid base parameters  $\omega_A$ ,  $\omega_D$ ,  $\omega_D / \omega_A$  and  $(\omega_D + \omega_A)$  of PMMA as a function of the temperature.

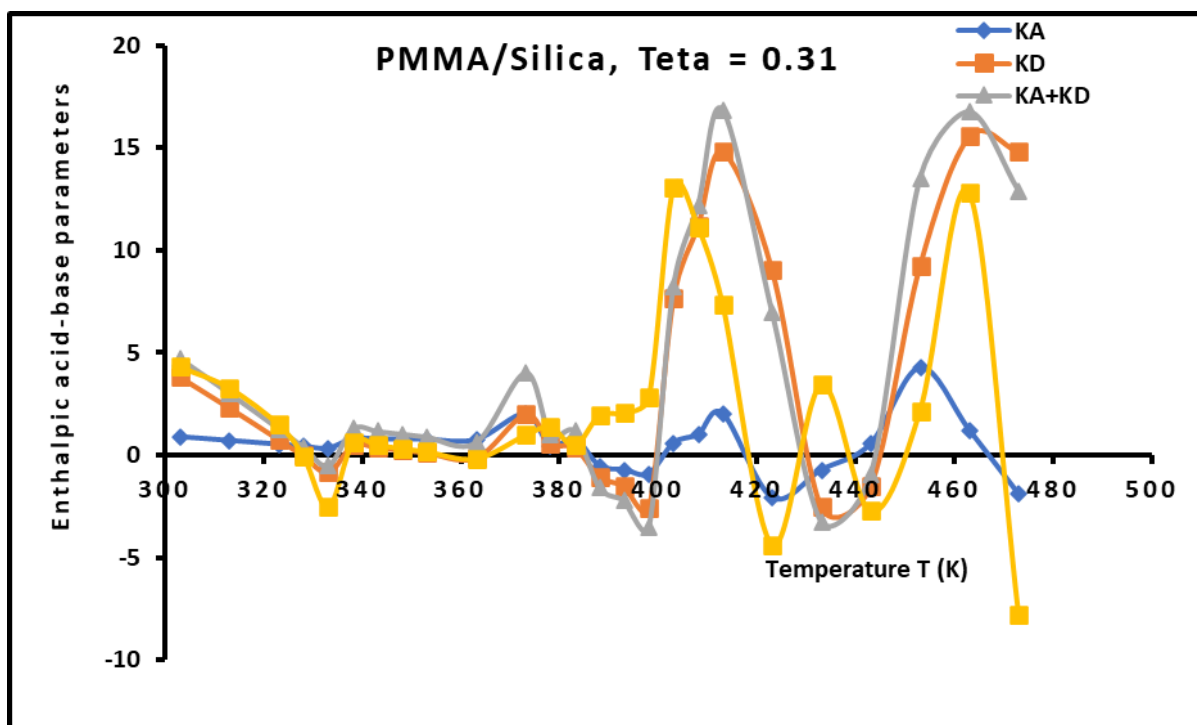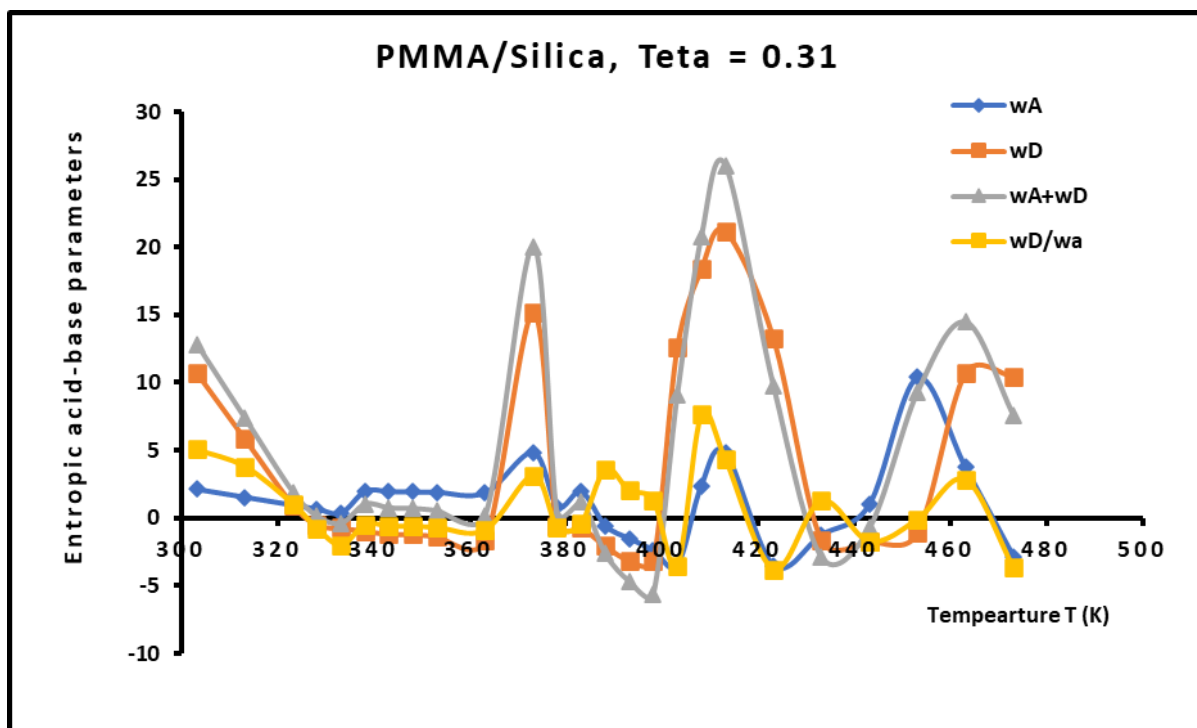

**Figure S9.** Evolutions of the enthalpic acid base parameters  $K_A$ ,  $K_D$ ,  $K_D/K_A$  and  $K_D + K_A$ , and the entropic acid base parameters  $\omega_A$ ,  $\omega_D$ ,  $\omega_D / \omega_A$  and  $(\omega_D + \omega_A)$  of PMMA/silica for  $\theta = 0.31$  as a function of the temperature.

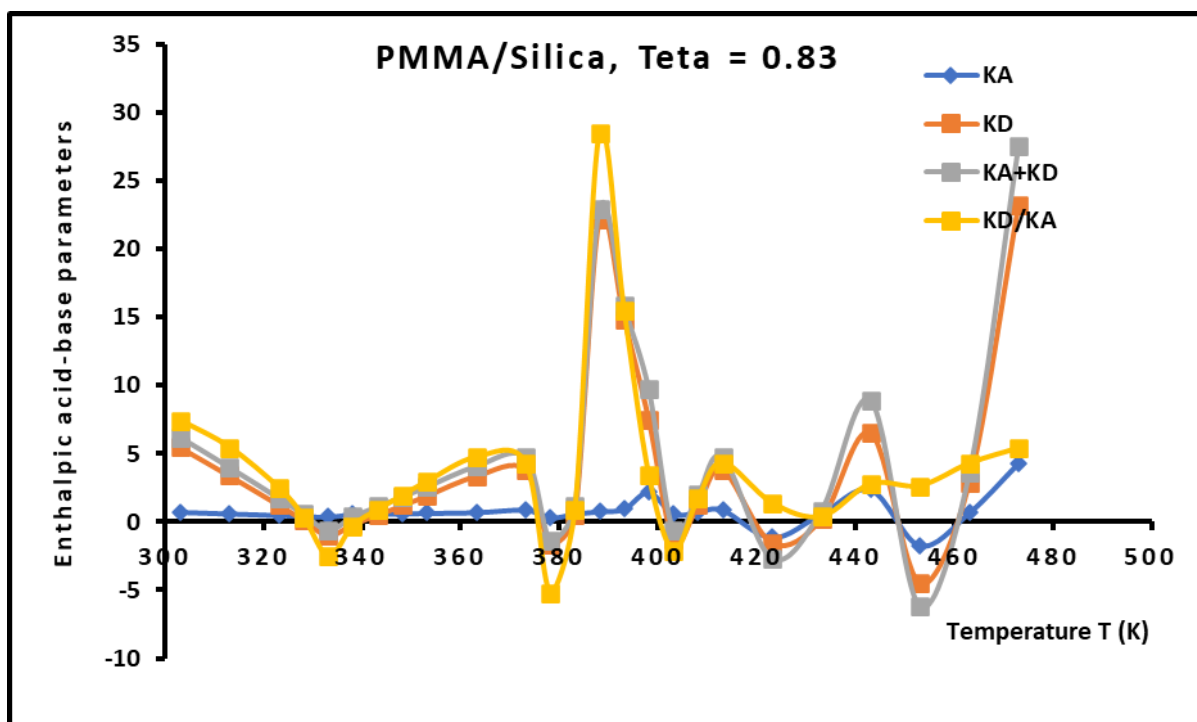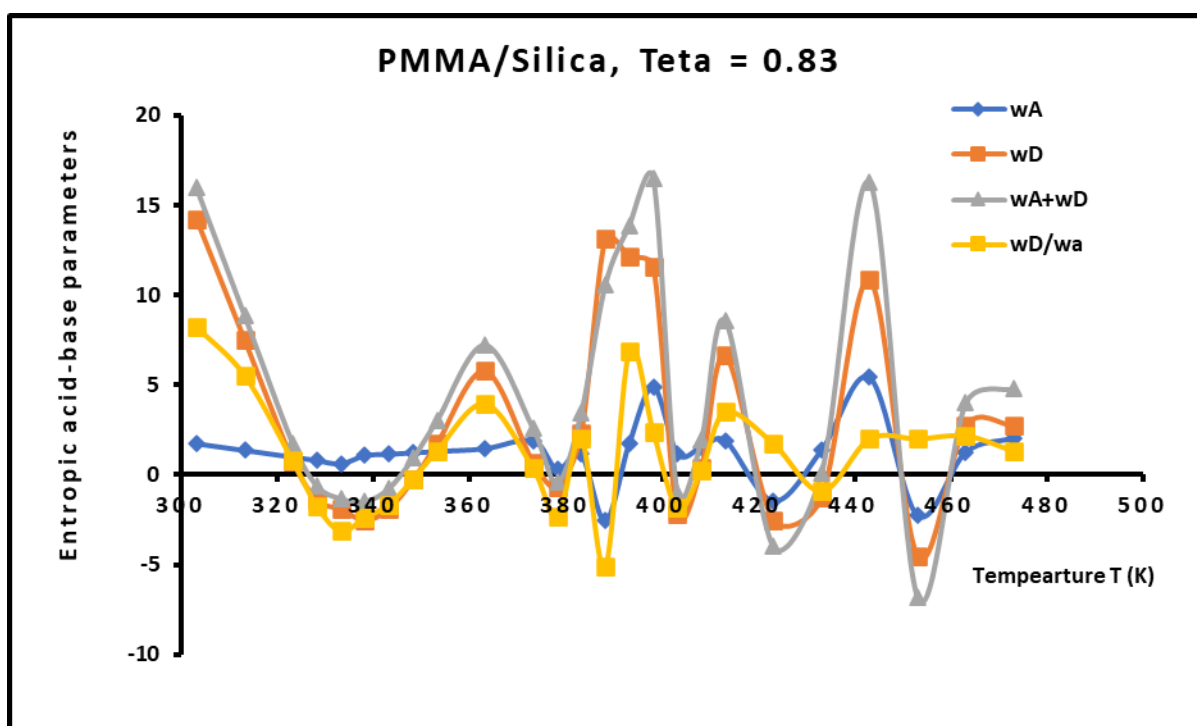

**Figure S10.** Evolutions of the enthalpic acid base parameters  $K_A$ ,  $K_D$ ,  $K_D/K_A$  and  $K_D + K_A$ , and the entropic acid base parameters  $\omega_A$ ,  $\omega_D$ ,  $\omega_D / \omega_A$  and  $(\omega_D + \omega_A)$  of PMMA/silica for  $\theta = 0.83$  as a function of the temperature.

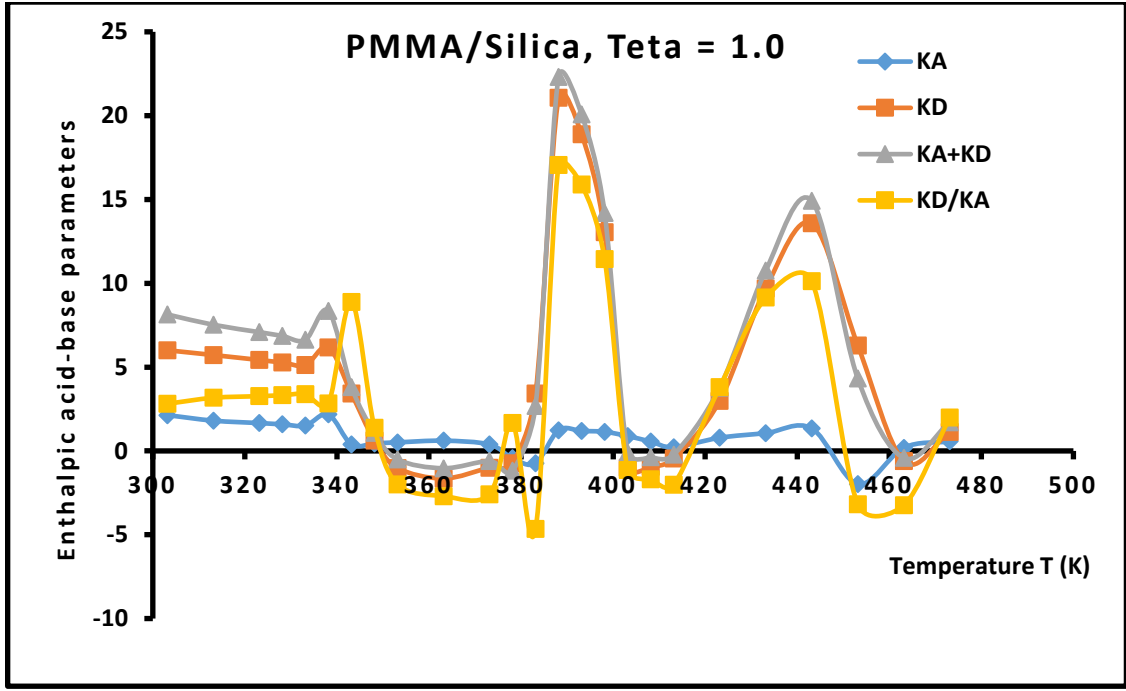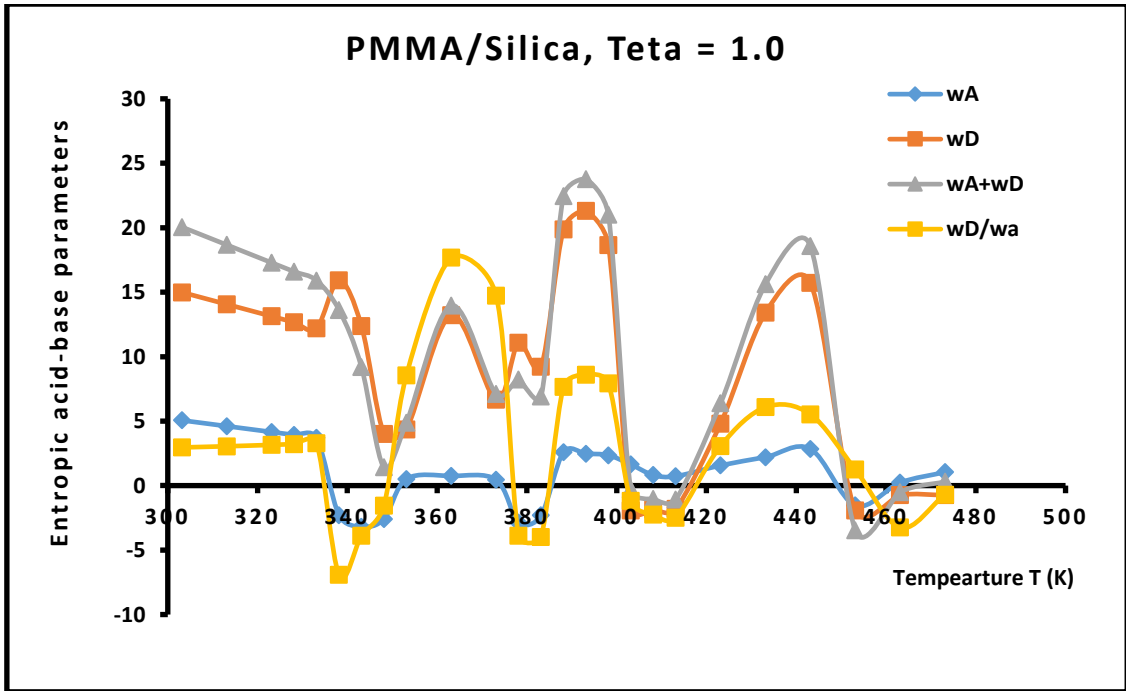

**Figure S11.** Evolutions of the enthalpic acid base parameters  $K_A$ ,  $K_D$ ,  $K_D/K_A$  and  $K_D + K_A$ , and the entropic acid base parameters  $\omega_A$ ,  $\omega_D$ ,  $\omega_D / \omega_A$  and  $(\omega_D + \omega_A)$  of PMMA/silica for  $\theta = 1.0$  as a function of the temperature.

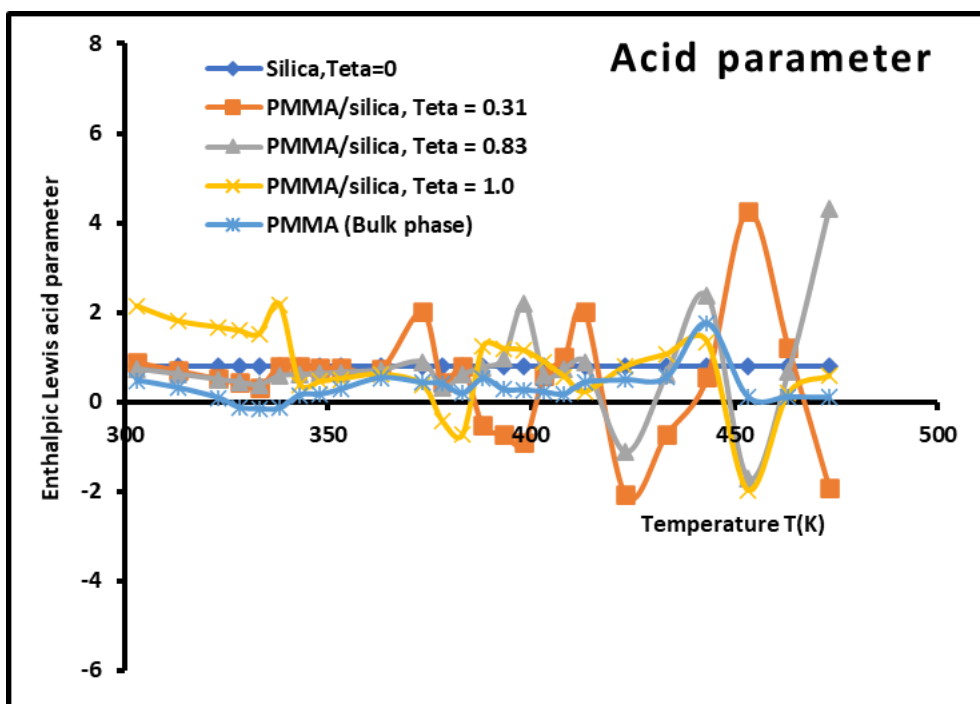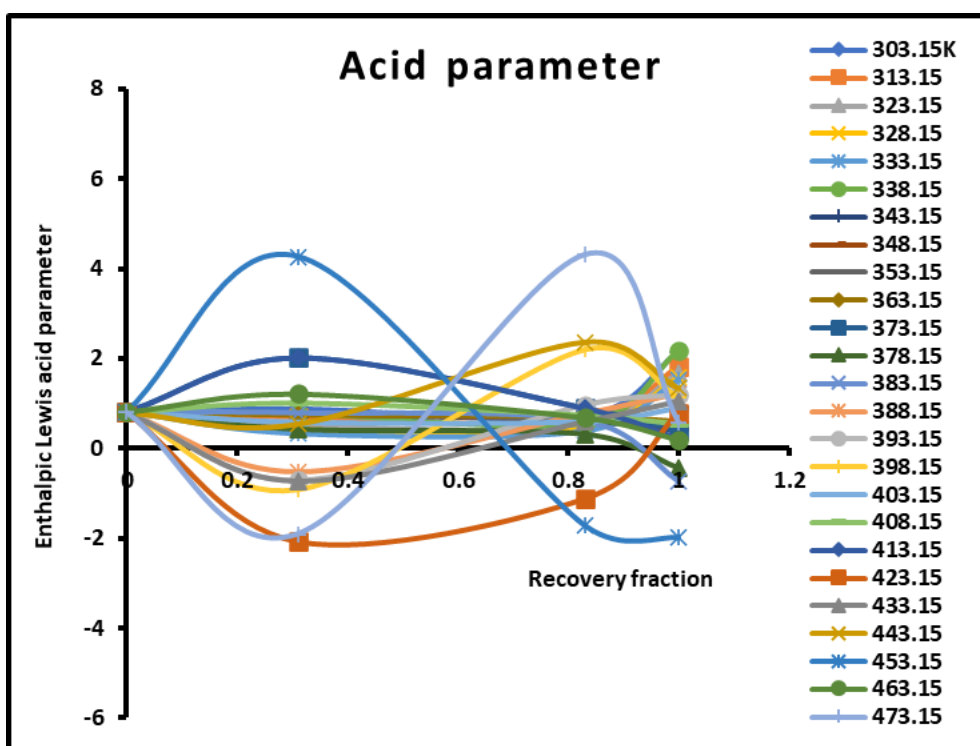

**Figure S12.** Evolutions of the enthalpic Lewis acid parameter  $K_A$  as a function of the recovery fraction and temperature.

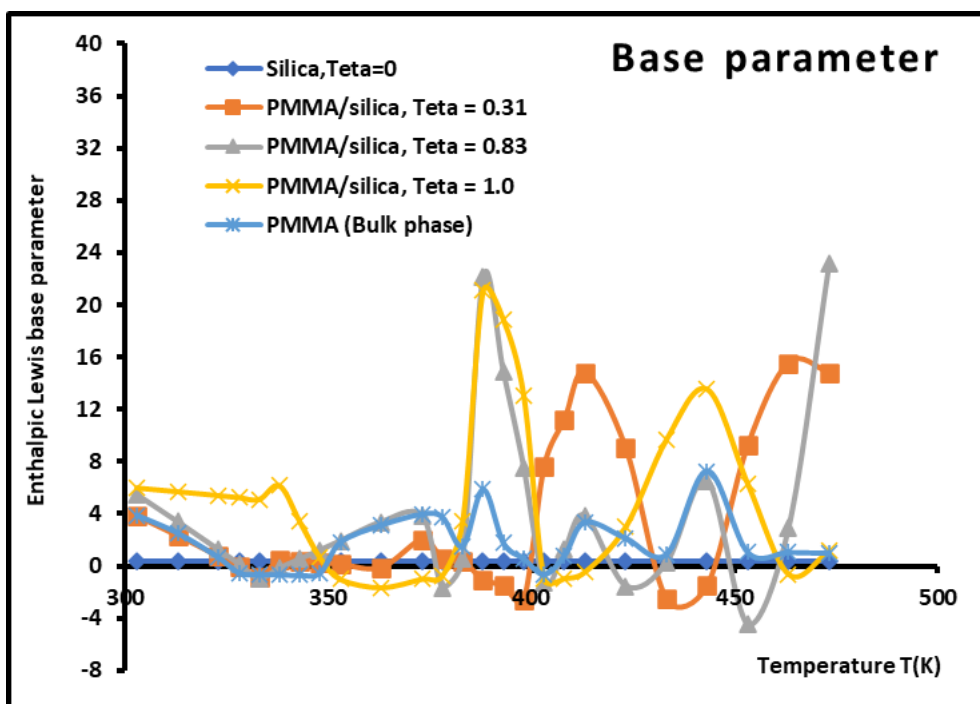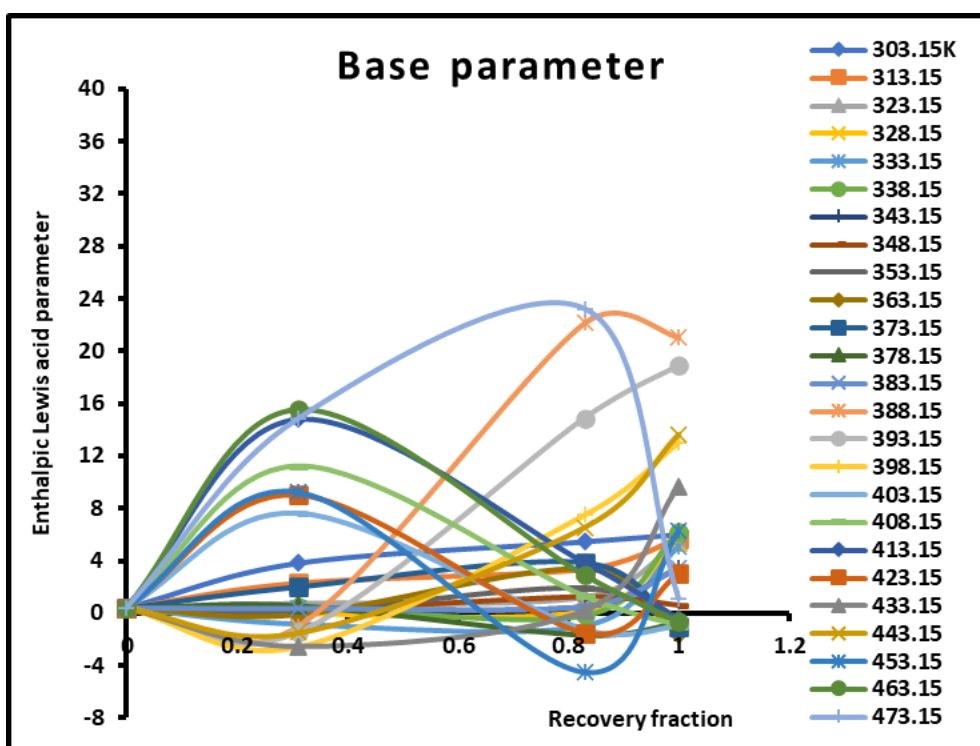

Figure S13. Evolutions of the enthalpic Lewis basic parameter  $K_D$  as a function of the recovery fraction and temperature.

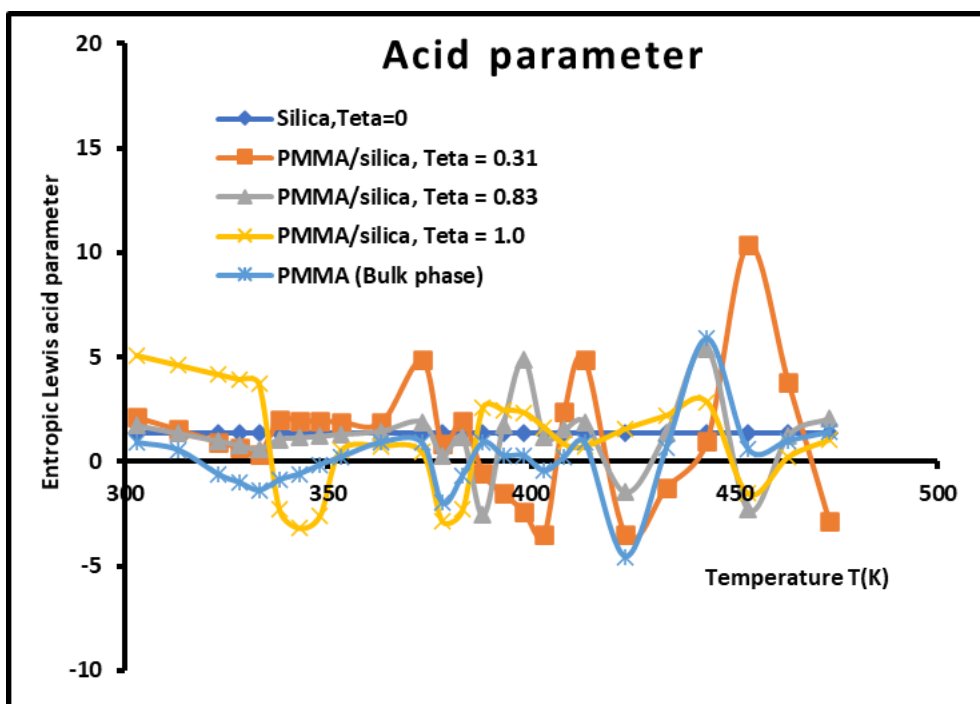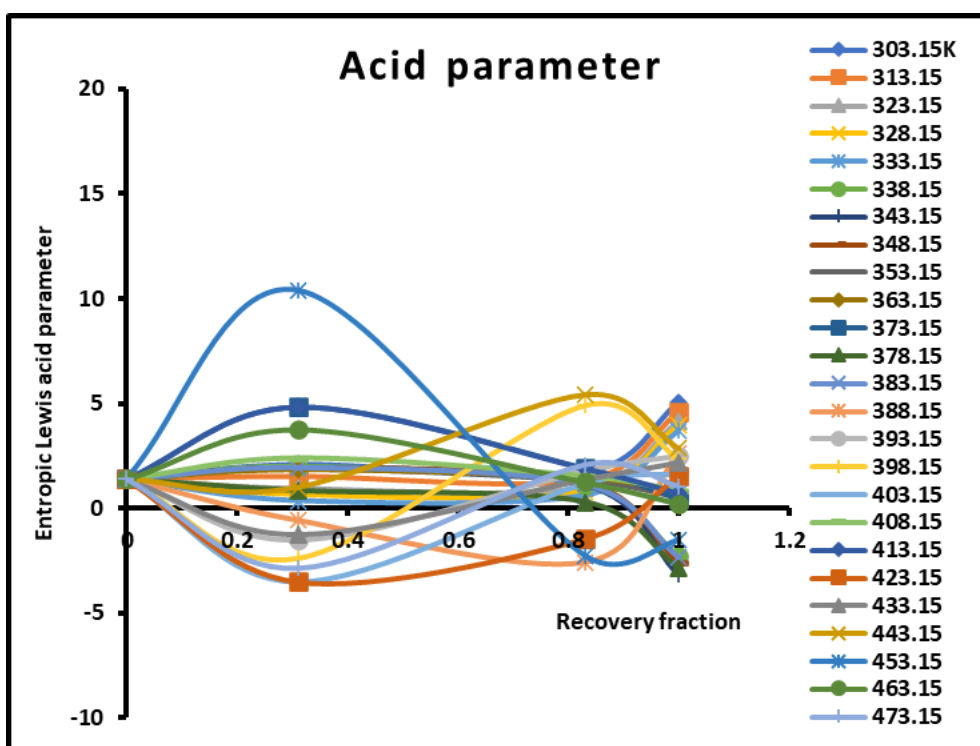

**Figure S14.** Evolutions of the entropic Lewis acidic parameter  $\omega_A$  as a function of the recovery fraction and temperature.

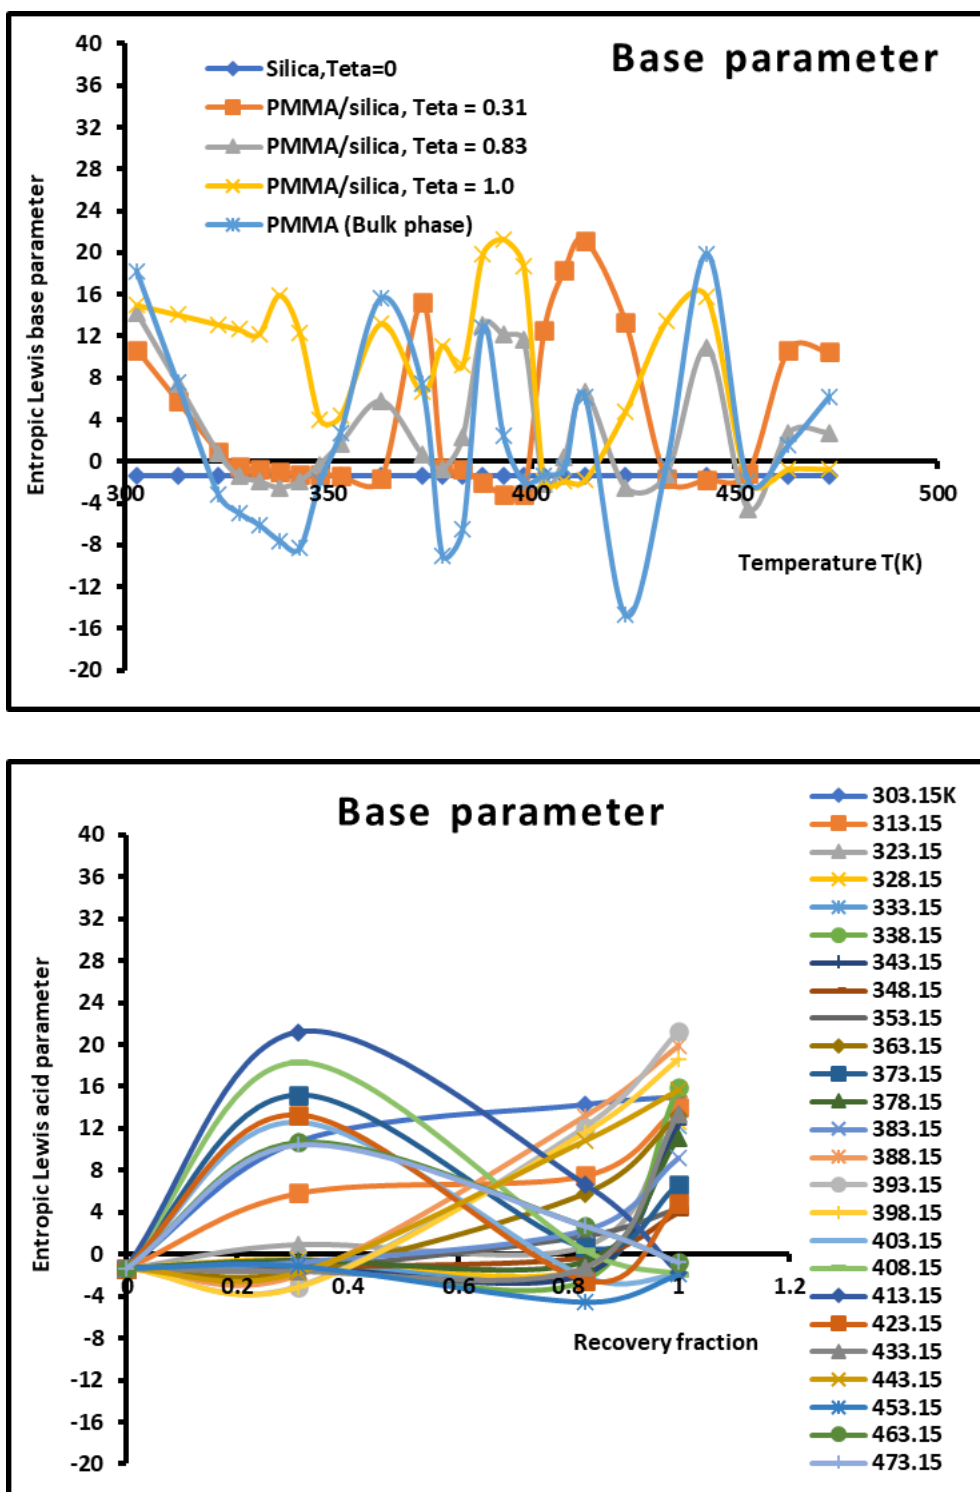

**Figure S15.** Evolutions of the entropic Lewis basic parameter  $\omega_D$  as a function of the recovery fraction and temperature.

**Table S14.** Values (in kJ/mol) of the London free dispersive interaction energy ( $-\Delta G_a^d(T)$ ) of organic solvents adsorbed on PMMA at different temperatures.

| T(K) | C5 | C6 | C7 | C8 | C9 | CCl4 | CH2Cl2 | CHCl3 | Diethyl | THF | Ethyl | Toluene |
|------|----|----|----|----|----|------|--------|-------|---------|-----|-------|---------|
|------|----|----|----|----|----|------|--------|-------|---------|-----|-------|---------|

|        |        |        |        |        |        |        |        |        | ether  | acetate |        |        |
|--------|--------|--------|--------|--------|--------|--------|--------|--------|--------|---------|--------|--------|
| 303.15 | 16.739 | 17.900 | 20.298 | 23.579 | 25.640 | 17.175 | 11.354 | 13.984 | 13.860 | 11.957  | 13.708 | 16.700 |
| 313.15 | 15.577 | 17.162 | 19.461 | 22.606 | 24.583 | 16.467 | 10.885 | 13.407 | 13.288 | 11.464  | 13.143 | 16.011 |
| 323.15 | 15.121 | 15.142 | 17.170 | 19.945 | 21.689 | 14.529 | 9.604  | 11.830 | 11.724 | 10.115  | 11.596 | 14.127 |
| 328.15 | 15.475 | 20.498 | 23.244 | 27.001 | 29.362 | 19.668 | 13.002 | 16.014 | 15.872 | 13.693  | 15.698 | 19.124 |
| 333.15 | 16.688 | 13.326 | 15.111 | 17.554 | 19.089 | 12.787 | 8.453  | 10.411 | 10.318 | 8.902   | 10.206 | 12.433 |
| 338.15 | 15.362 | 14.396 | 16.325 | 18.963 | 20.621 | 13.813 | 9.131  | 11.247 | 11.147 | 9.617   | 11.025 | 13.431 |
| 343.15 | 14.497 | 13.059 | 14.808 | 17.201 | 18.706 | 12.530 | 8.283  | 10.202 | 10.111 | 8.723   | 10.001 | 12.183 |
| 348.15 | 13.856 | 10.575 | 11.991 | 13.929 | 15.147 | 10.146 | 6.707  | 8.261  | 8.188  | 7.064   | 8.098  | 9.866  |
| 353.15 | 13.389 | 15.850 | 17.974 | 20.878 | 22.704 | 15.208 | 10.054 | 12.383 | 12.273 | 10.588  | 12.139 | 14.788 |
| 363.15 | 12.791 | 15.142 | 17.170 | 19.945 | 21.689 | 14.529 | 9.604  | 11.830 | 11.724 | 10.115  | 11.596 | 14.127 |
| 373.15 | 13.038 | 15.435 | 17.502 | 20.331 | 22.109 | 14.810 | 9.790  | 12.058 | 11.951 | 10.310  | 11.820 | 14.400 |
| 378.15 | 14.781 | 17.497 | 19.841 | 23.048 | 25.063 | 16.789 | 11.098 | 13.670 | 13.548 | 11.688  | 13.400 | 16.324 |
| 383.15 | 17.316 | 20.498 | 23.244 | 27.001 | 29.362 | 19.668 | 13.002 | 16.014 | 15.872 | 13.693  | 15.698 | 19.124 |
| 388.15 | 14.205 | 16.815 | 19.068 | 22.150 | 24.087 | 16.135 | 10.666 | 13.137 | 13.020 | 11.233  | 12.878 | 15.688 |
| 393.15 | 12.495 | 14.792 | 16.773 | 19.484 | 21.188 | 14.193 | 9.382  | 11.556 | 11.453 | 9.881   | 11.328 | 13.800 |
| 398.15 | 11.805 | 13.975 | 15.847 | 18.409 | 20.018 | 13.409 | 8.864  | 10.918 | 10.821 | 9.335   | 10.703 | 13.038 |
| 403.15 | 11.257 | 13.326 | 15.111 | 17.554 | 19.089 | 12.787 | 8.453  | 10.411 | 10.318 | 8.902   | 10.206 | 12.433 |
| 408.15 | 11.053 | 13.085 | 14.838 | 17.236 | 18.743 | 12.555 | 8.299  | 10.222 | 10.131 | 8.741   | 10.021 | 12.207 |
| 413.15 | 10.890 | 12.892 | 14.619 | 16.982 | 18.467 | 12.370 | 8.177  | 10.072 | 9.982  | 8.612   | 9.873  | 12.028 |
| 423.15 | 12.161 | 14.396 | 16.325 | 18.963 | 20.621 | 13.813 | 9.131  | 11.247 | 11.147 | 9.617   | 11.025 | 13.431 |
| 433.15 | 14.559 | 17.234 | 19.543 | 22.702 | 24.687 | 16.537 | 10.931 | 13.464 | 13.344 | 11.513  | 13.199 | 16.079 |
| 443.15 | 11.031 | 13.059 | 14.808 | 17.201 | 18.706 | 12.530 | 8.283  | 10.202 | 10.111 | 8.723   | 10.001 | 12.183 |
| 453.15 | 9.386  | 11.112 | 12.600 | 14.637 | 15.916 | 10.662 | 7.048  | 8.681  | 8.604  | 7.423   | 8.510  | 10.367 |
| 463.15 | 8.933  | 10.575 | 11.991 | 13.929 | 15.147 | 10.146 | 6.707  | 8.261  | 8.188  | 7.064   | 8.098  | 9.866  |
| 473.15 | 7.692  | 9.106  | 10.326 | 11.994 | 13.043 | 8.737  | 5.776  | 7.114  | 7.051  | 6.083   | 6.974  | 8.495  |

**Table S15.** Values (in kJ/mol) of the London free dispersive interaction energy ( $-\Delta G_a^d(T)$ ) of organic solvents adsorbed on PMMA/silica for  $\theta = 0.31$  at different temperatures.

| T(K)   | C5     | C6     | C7     | C8     | C9     | CCl4   | CH2Cl2 | CHCl3  | Diethyl ether | THF    | Ethyl acetate | Toluene |
|--------|--------|--------|--------|--------|--------|--------|--------|--------|---------------|--------|---------------|---------|
| 303.15 | 22.286 | 26.382 | 29.916 | 34.751 | 37.790 | 25.314 | 16.734 | 20.611 | 20.427        | 17.623 | 20.204        | 24.613  |
| 313.15 | 20.936 | 24.784 | 28.104 | 32.646 | 35.501 | 23.780 | 15.720 | 19.362 | 19.190        | 16.556 | 18.980        | 23.122  |
| 323.15 | 19.947 | 23.612 | 26.776 | 31.103 | 33.823 | 22.657 | 14.977 | 18.447 | 18.283        | 15.773 | 18.083        | 22.030  |
| 328.15 | 19.637 | 23.246 | 26.360 | 30.620 | 33.298 | 22.305 | 14.744 | 18.161 | 17.999        | 15.528 | 17.802        | 21.687  |
| 333.15 | 19.891 | 23.547 | 26.702 | 31.017 | 33.730 | 22.594 | 14.936 | 18.396 | 18.232        | 15.730 | 18.033        | 21.969  |
| 338.15 | 20.117 | 23.815 | 27.005 | 31.369 | 34.113 | 22.850 | 15.105 | 18.605 | 18.439        | 15.908 | 18.238        | 22.218  |
| 343.15 | 20.384 | 24.131 | 27.363 | 31.786 | 34.566 | 23.154 | 15.306 | 18.852 | 18.684        | 16.119 | 18.480        | 22.513  |
| 348.15 | 19.264 | 22.805 | 25.860 | 30.039 | 32.666 | 21.881 | 14.465 | 17.816 | 17.658        | 15.234 | 17.465        | 21.276  |
| 353.15 | 18.174 | 21.514 | 24.396 | 28.339 | 30.817 | 20.643 | 13.646 | 16.808 | 16.658        | 14.371 | 16.476        | 20.072  |
| 363.15 | 16.682 | 19.748 | 22.394 | 26.013 | 28.288 | 18.949 | 12.526 | 15.428 | 15.291        | 13.192 | 15.124        | 18.424  |



|        |        |        |        |        |        |        |        |        |        |        |        |        |
|--------|--------|--------|--------|--------|--------|--------|--------|--------|--------|--------|--------|--------|
| 373.15 | 15.306 | 18.119 | 20.547 | 23.868 | 25.955 | 17.386 | 11.493 | 14.156 | 14.030 | 12.104 | 13.877 | 16.905 |
| 378.15 | 15.017 | 17.777 | 20.158 | 23.416 | 25.464 | 17.057 | 11.275 | 13.888 | 13.764 | 11.875 | 13.614 | 16.585 |
| 383.15 | 14.868 | 17.601 | 19.959 | 23.185 | 25.212 | 16.889 | 11.164 | 13.751 | 13.628 | 11.758 | 13.480 | 16.421 |
| 388.15 | 15.275 | 18.083 | 20.505 | 23.819 | 25.902 | 17.351 | 11.470 | 14.127 | 14.001 | 12.079 | 13.848 | 16.870 |
| 393.15 | 16.380 | 19.390 | 21.988 | 25.541 | 27.775 | 18.605 | 12.299 | 15.149 | 15.014 | 12.953 | 14.850 | 18.090 |
| 398.15 | 17.550 | 20.775 | 23.558 | 27.365 | 29.759 | 19.934 | 13.177 | 16.230 | 16.086 | 13.878 | 15.910 | 19.382 |
| 403.15 | 16.428 | 19.447 | 22.052 | 25.616 | 27.856 | 18.660 | 12.335 | 15.193 | 15.058 | 12.991 | 14.893 | 18.143 |
| 408.15 | 15.118 | 17.897 | 20.294 | 23.574 | 25.636 | 17.172 | 11.352 | 13.982 | 13.857 | 11.955 | 13.706 | 16.697 |
| 413.15 | 13.956 | 16.521 | 18.734 | 21.761 | 23.664 | 15.852 | 10.479 | 12.907 | 12.792 | 11.036 | 12.652 | 15.413 |
| 423.15 | 13.182 | 15.605 | 17.695 | 20.555 | 22.353 | 14.973 | 9.898  | 12.191 | 12.083 | 10.424 | 11.951 | 14.559 |
| 433.15 | 13.463 | 15.937 | 18.072 | 20.993 | 22.828 | 15.292 | 10.109 | 12.451 | 12.340 | 10.646 | 12.205 | 14.868 |
| 443.15 | 13.581 | 16.077 | 18.231 | 21.177 | 23.029 | 15.426 | 10.197 | 12.560 | 12.448 | 10.739 | 12.312 | 14.999 |
| 453.15 | 12.096 | 14.319 | 16.237 | 18.861 | 20.510 | 13.739 | 9.082  | 11.186 | 11.087 | 9.565  | 10.966 | 13.359 |
| 463.15 | 11.610 | 13.744 | 15.586 | 18.105 | 19.688 | 13.188 | 8.718  | 10.738 | 10.642 | 9.181  | 10.526 | 12.823 |
| 473.15 | 10.164 | 12.032 | 13.644 | 15.849 | 17.235 | 11.545 | 7.632  | 9.400  | 9.316  | 8.037  | 9.215  | 11.225 |

**Table S16.** Values (in kJ/mol) of the London free dispersive interaction energy ( $-\Delta G_a^d(T)$ ) of organic solvents adsorbed on PMMA/silica for  $\theta = 0.83$  at different temperatures.

| T(K)   | C5     | C6     | C7     | C8     | C9     | CCl4   | CH2Cl2 | CHCl3  | Diethyl ether | THF    | Ethyl acetate | Toluene |
|--------|--------|--------|--------|--------|--------|--------|--------|--------|---------------|--------|---------------|---------|
| 303.15 | 19.989 | 23.662 | 26.833 | 31.169 | 33.895 | 22.705 | 15.009 | 18.486 | 18.322        | 15.807 | 18.122        | 22.076  |
| 313.15 | 19.173 | 22.697 | 25.737 | 29.897 | 32.511 | 21.778 | 14.396 | 17.732 | 17.574        | 15.161 | 17.382        | 21.175  |
| 323.15 | 18.025 | 21.338 | 24.196 | 28.107 | 30.565 | 20.474 | 13.534 | 16.670 | 16.522        | 14.254 | 16.341        | 19.907  |
| 328.15 | 18.434 | 21.822 | 24.746 | 28.745 | 31.259 | 20.939 | 13.841 | 17.049 | 16.897        | 14.577 | 16.712        | 20.359  |
| 333.15 | 19.158 | 22.679 | 25.718 | 29.874 | 32.486 | 21.761 | 14.385 | 17.718 | 17.560        | 15.150 | 17.369        | 21.159  |
| 338.15 | 18.596 | 22.014 | 24.963 | 28.997 | 31.533 | 21.122 | 13.963 | 17.198 | 17.045        | 14.705 | 16.859        | 20.538  |
| 343.15 | 17.912 | 21.204 | 24.045 | 27.931 | 30.374 | 20.346 | 13.450 | 16.566 | 16.418        | 14.165 | 16.239        | 19.783  |
| 348.15 | 17.162 | 20.317 | 23.038 | 26.762 | 29.102 | 19.494 | 12.887 | 15.872 | 15.731        | 13.572 | 15.559        | 18.955  |
| 353.15 | 16.295 | 19.289 | 21.874 | 25.409 | 27.631 | 18.508 | 12.235 | 15.070 | 14.936        | 12.885 | 14.773        | 17.996  |
| 363.15 | 15.034 | 17.797 | 20.181 | 23.442 | 25.492 | 17.076 | 11.288 | 13.904 | 13.780        | 11.888 | 13.629        | 16.604  |
| 373.15 | 13.379 | 15.837 | 17.959 | 20.862 | 22.686 | 15.196 | 10.045 | 12.373 | 12.263        | 10.579 | 12.129        | 14.776  |
| 378.15 | 12.926 | 15.302 | 17.352 | 20.156 | 21.919 | 14.682 | 9.706  | 11.955 | 11.848        | 10.222 | 11.719        | 14.276  |
| 383.15 | 14.022 | 16.599 | 18.822 | 21.864 | 23.776 | 15.927 | 10.528 | 12.968 | 12.852        | 11.088 | 12.712        | 15.486  |
| 388.15 | 17.032 | 20.162 | 22.863 | 26.558 | 28.880 | 19.346 | 12.788 | 15.752 | 15.611        | 13.468 | 15.441        | 18.810  |
| 393.15 | 15.482 | 18.328 | 20.783 | 24.142 | 26.253 | 17.586 | 11.625 | 14.318 | 14.191        | 12.243 | 14.036        | 17.099  |
| 398.15 | 14.457 | 17.114 | 19.406 | 22.543 | 24.514 | 16.421 | 10.855 | 13.370 | 13.251        | 11.432 | 13.106        | 15.966  |
| 403.15 | 13.654 | 16.163 | 18.328 | 21.291 | 23.152 | 15.509 | 10.252 | 12.627 | 12.515        | 10.797 | 12.378        | 15.079  |
| 408.15 | 12.510 | 14.810 | 16.794 | 19.508 | 21.214 | 14.210 | 9.393  | 11.570 | 11.467        | 9.893  | 11.342        | 13.817  |
| 413.15 | 11.428 | 13.528 | 15.341 | 17.820 | 19.378 | 12.981 | 8.581  | 10.569 | 10.475        | 9.037  | 10.360        | 12.621  |
| 423.15 | 11.099 | 13.139 | 14.899 | 17.307 | 18.820 | 12.607 | 8.334  | 10.265 | 10.173        | 8.777  | 10.062        | 12.258  |
| 433.15 | 13.050 | 15.448 | 17.517 | 20.349 | 22.128 | 14.823 | 9.798  | 12.069 | 11.961        | 10.319 | 11.831        | 14.412  |
| 443.15 | 10.863 | 12.860 | 14.583 | 16.939 | 18.421 | 12.339 | 8.157  | 10.047 | 9.957         | 8.590  | 9.849         | 11.998  |

|        |       |        |        |        |        |        |       |       |       |       |       |        |
|--------|-------|--------|--------|--------|--------|--------|-------|-------|-------|-------|-------|--------|
| 453.15 | 9.888 | 11.705 | 13.273 | 15.419 | 16.767 | 11.231 | 7.424 | 9.145 | 9.063 | 7.819 | 8.964 | 10.920 |
| 463.15 | 9.516 | 11.265 | 12.774 | 14.839 | 16.136 | 10.809 | 7.145 | 8.801 | 8.722 | 7.525 | 8.627 | 10.510 |
| 473.15 | 8.272 | 9.793  | 11.105 | 12.899 | 14.027 | 9.396  | 6.211 | 7.651 | 7.582 | 6.542 | 7.500 | 9.136  |

**Table S17.** Values (in kJ/mol) of the London free dispersive interaction energy ( $-\Delta G_a^d(T)$ ) of organic solvents adsorbed on PMMA/silica for  $\theta = 1.0$  (monolayer) at different temperatures.

| T(K)   | C5     | C6     | C7     | C8     | C9     | CCl4   | CH2Cl2 | CHCl3  | Diethyl ether | THF    | Ethyl acetate | Toluene |
|--------|--------|--------|--------|--------|--------|--------|--------|--------|---------------|--------|---------------|---------|
| 303.15 | 19.008 | 22.501 | 25.516 | 29.639 | 32.231 | 21.590 | 14.272 | 17.579 | 17.423        | 15.031 | 17.232        | 20.993  |
| 313.15 | 18.022 | 21.335 | 24.193 | 28.103 | 30.560 | 20.471 | 13.532 | 16.668 | 16.519        | 14.252 | 16.339        | 19.904  |
| 323.15 | 16.901 | 20.007 | 22.687 | 26.354 | 28.659 | 19.197 | 12.690 | 15.631 | 15.491        | 13.365 | 15.322        | 18.666  |
| 328.15 | 17.360 | 20.550 | 23.303 | 27.069 | 29.437 | 19.718 | 13.035 | 16.055 | 15.912        | 13.728 | 15.738        | 19.172  |
| 333.15 | 18.192 | 21.536 | 24.421 | 28.368 | 30.849 | 20.664 | 13.660 | 16.825 | 16.675        | 14.386 | 16.493        | 20.092  |
| 338.15 | 17.475 | 20.686 | 23.457 | 27.249 | 29.631 | 19.849 | 13.121 | 16.161 | 16.017        | 13.818 | 15.842        | 19.299  |
| 343.15 | 19.336 | 22.889 | 25.956 | 30.151 | 32.787 | 21.963 | 14.518 | 17.882 | 17.723        | 15.290 | 17.530        | 21.355  |
| 348.15 | 19.617 | 23.223 | 26.334 | 30.590 | 33.265 | 22.283 | 14.730 | 18.143 | 17.981        | 15.513 | 17.785        | 21.666  |
| 353.15 | 15.341 | 18.160 | 20.593 | 23.921 | 26.013 | 17.425 | 11.519 | 14.188 | 14.061        | 12.131 | 13.908        | 16.943  |
| 363.15 | 14.091 | 16.681 | 18.916 | 21.973 | 23.895 | 16.006 | 10.581 | 13.032 | 12.916        | 11.143 | 12.775        | 15.563  |
| 373.15 | 12.389 | 14.666 | 16.631 | 19.319 | 21.008 | 14.072 | 9.303  | 11.458 | 11.356        | 9.797  | 11.232        | 13.683  |
| 378.15 | 12.160 | 14.395 | 16.324 | 18.962 | 20.620 | 13.813 | 9.131  | 11.246 | 11.146        | 9.616  | 11.024        | 13.430  |
| 383.15 | 15.057 | 17.825 | 20.213 | 23.479 | 25.532 | 17.103 | 11.306 | 13.925 | 13.801        | 11.907 | 13.651        | 16.630  |
| 388.15 | 17.892 | 21.180 | 24.017 | 27.899 | 30.339 | 20.322 | 13.434 | 16.547 | 16.399        | 14.148 | 16.220        | 19.760  |
| 393.15 | 16.704 | 19.774 | 22.423 | 26.047 | 28.324 | 18.973 | 12.542 | 15.448 | 15.311        | 13.209 | 15.143        | 18.448  |
| 398.15 | 15.382 | 18.209 | 20.649 | 23.986 | 26.084 | 17.472 | 11.550 | 14.226 | 14.099        | 12.164 | 13.945        | 16.989  |
| 403.15 | 13.446 | 15.917 | 18.049 | 20.966 | 22.800 | 15.272 | 10.096 | 12.435 | 12.324        | 10.633 | 12.190        | 14.850  |
| 408.15 | 12.147 | 14.379 | 16.306 | 18.941 | 20.597 | 13.797 | 9.121  | 11.234 | 11.134        | 9.605  | 11.012        | 13.415  |
| 413.15 | 11.159 | 13.209 | 14.979 | 17.400 | 18.921 | 12.675 | 8.379  | 10.320 | 10.228        | 8.824  | 10.116        | 12.324  |
| 423.15 | 10.935 | 12.945 | 14.679 | 17.051 | 18.542 | 12.420 | 8.211  | 10.113 | 10.023        | 8.647  | 9.913         | 12.077  |
| 433.15 | 12.745 | 15.088 | 17.109 | 19.874 | 21.612 | 14.477 | 9.570  | 11.787 | 11.682        | 10.079 | 11.555        | 14.076  |
| 443.15 | 10.190 | 12.063 | 13.679 | 15.890 | 17.280 | 11.575 | 7.652  | 9.425  | 9.341         | 8.058  | 9.239         | 11.255  |
| 453.15 | 8.844  | 10.469 | 11.872 | 13.790 | 14.996 | 10.045 | 6.640  | 8.179  | 8.106         | 6.993  | 8.018         | 9.767   |
| 463.15 | 8.491  | 10.052 | 11.398 | 13.240 | 14.398 | 9.645  | 6.376  | 7.853  | 7.783         | 6.714  | 7.698         | 9.378   |
| 473.15 | 7.424  | 8.788  | 9.966  | 11.576 | 12.589 | 8.432  | 5.574  | 6.866  | 6.805         | 5.871  | 6.730         | 8.199   |

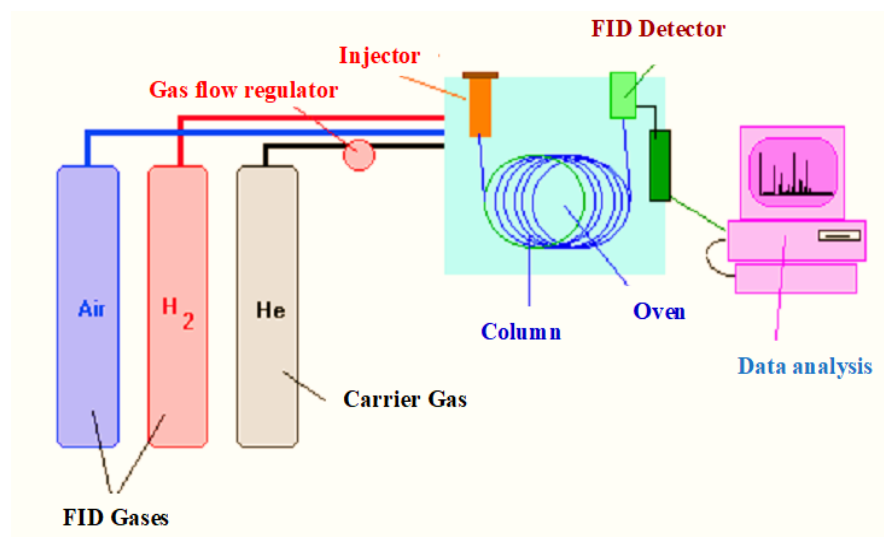

**Figure S16.** Elements of a gas chromatograph
